# Supplementary material for: A computational study of the effects of ancillary ligands on copper(i)–ethylene interaction
Source: Royal Society of Chemistry journal article supplement (doi:10.1039/c5nj00546a), 2015-01-01
Supplement: c5nj00546a1.pdf [file c5nj00546a1.pdf]

## Supporting Information

### Computational study of the effects of the ancillary ligands on Copper(I)-ethylene interaction.

Stéphanie HALBERT<sup>1,2\*</sup>, Hélène GERARD<sup>1,2</sup>.

1. Sorbonne Universités, UPMC Univ Paris 06, UMR 7616, Laboratoire de Chimie Théorique, F-75005, Paris, France

2. CNRS, UMR 7616, Laboratoire de Chimie Théorique, F-75005, Paris, France UPMC Université Paris 06

Figure S1: Correlation C=C bond distances (Å) vs HHCC dihedral angle (°) for ethylene-Cu complexes.

Figure S2: C=C vs Cu-C distances (in Å) as function of the number of ligands binding sites in addition to ethylene (n=1, 2 or 3).

Figure S3: Correlation of Cu→ethylene back-donation computed with CDA (noted b) and NBO (noted π\*) analysis for ethylene-Cu complexes (complex **25** is not included).

Figure S4: Correlation of Cu→ethylene back-donation computed with CDA (noted b) and NBO (noted π\*) analysis for all complexes (complex **25** is included).

Figure S5: Ethylene→Cu donation (b) computed with CDA and NBO analysis for all complexes (complex **25** is not included).

Figure S6: Total electron transfer (donation + back-donation) computed with CDA and NBO analysis for all complexes (complex **25** is not included).

Figure S7: Total electron transfer (donation + back-donation) computed with NBO analysis of the complexes plotted against Bond Dissociation Energies (in kcal/mol).

Figure S8: Total electron transfer (donation + back-donation) computed with NBO analysis of the complexes plotted against Deformation Energies (in kcal/mol).

Figure S9: Total electron transfer (donation + back-donation) computed with NBO analysis of the complexes plotted against Interaction Energies (in kcal/mol).

Figure S10: Ethylene→Cu donation and Cu→Ethylene back-donation, defining by the electron occupancies of π and π\* NBO molecular orbital of the ethylene, of the complexes plotted against C=C bond distance (in Å).

Figure S11: Ethylene→Cu donation and Cu→Ethylene back-donation, defining by the electron occupancies of π and π\* NBO molecular orbital of the ethylene, of the complexes plotted against Deformation Energies (in kcal/mol).

Figure S12: Ethylene→Cu donation and Cu→Ethylene back-donation, defining by the electron occupancies of π and π\* NBO molecular orbital of the ethylene, of the complexes plotted against Dissociation Energies (in kcal/mol).

Figure S13: Ethylene→Cu donation and Cu→Ethylene back-donation (defining by the electron occupancies of π and π\* NBO molecular orbital of the ethylene) of the complexes plotted against Interaction Energies (in kcal/mol).

Figure S14: Ethylene→Cu donation (d) and Cu→Ethylene back-donation (b) (CDA analysis) of the complexes plotted against C=C bond distances (in Å).

Chart S1: Schematic representation of [Cu(tme)(C<sub>2</sub>H<sub>4</sub>)]<sup>+</sup> complex.

Table S1: Calculated and experimental geometries (distances in Å, angles in degrees) for [Cu(tme)(C<sub>2</sub>H<sub>4</sub>)]<sup>+</sup> system. A comparison of different functionals (PW91, B3LYP, B3PW91, PBEPBE, M06) and second order Moller Plesset level (MP2).

Cartesian coordinates.

#### Corresponding Author

\* Email: halbert@lct.jussieu.fr

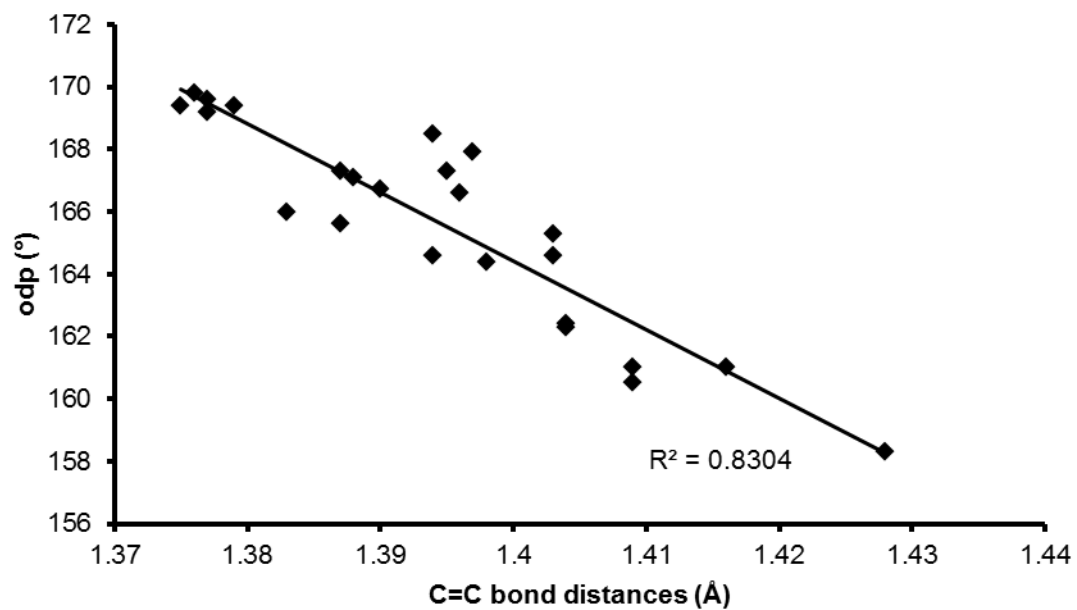

Figure S1: Correlation C=C bond distances (Å) vs HHCC dihedral angle odp (°) for ethylene-Cu complexes.

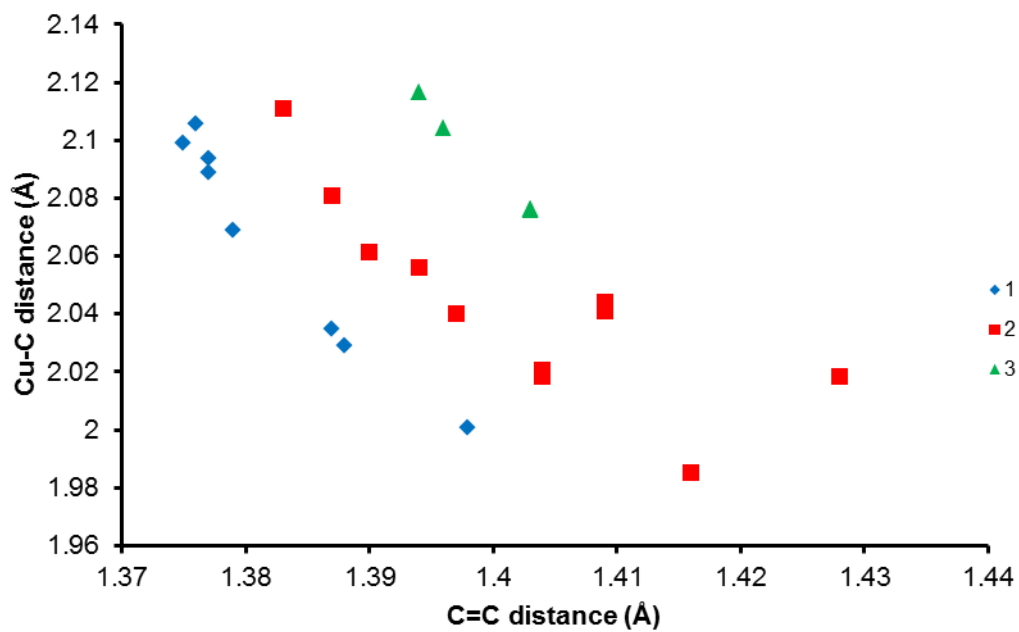

Figure S2: C=C vs Cu-C distances (in Å) as a function of the number of ligands binding sites in addition to ethylene (n=1, 2 or 3).

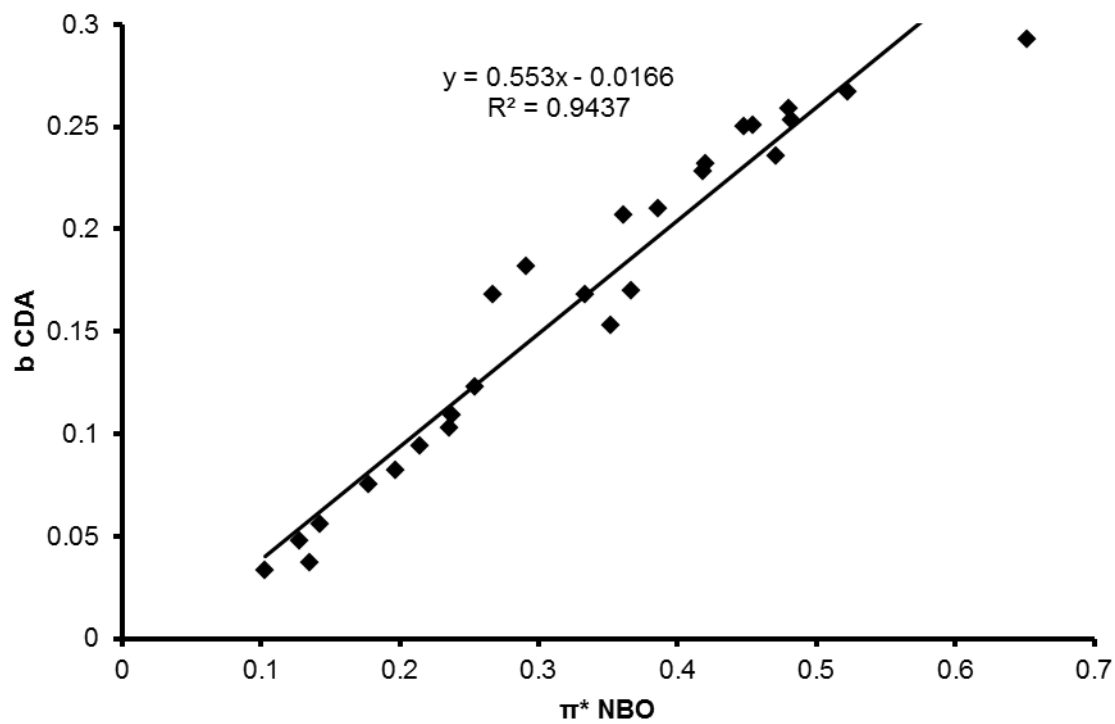

Figure S3: Correlation of Cu→ethylene back-donation computed with CDA (noted  $b$ ) and NBO (noted  $\pi^*$ ) analysis for ethylene-Cu complexes (complex **25** is not included).

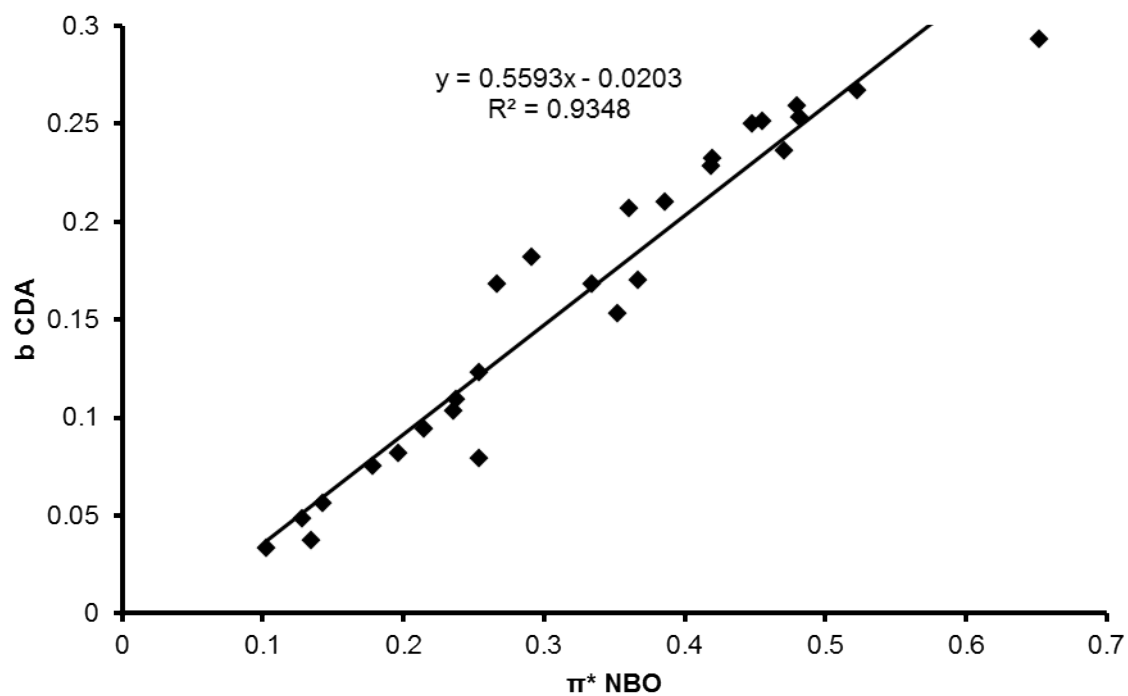

Figure S4: Correlation of Cu→ethylene back-donation computed with CDA (noted  $b$ ) and NBO (noted  $\pi^*$ ) analysis for all complexes (complex **25** is included).

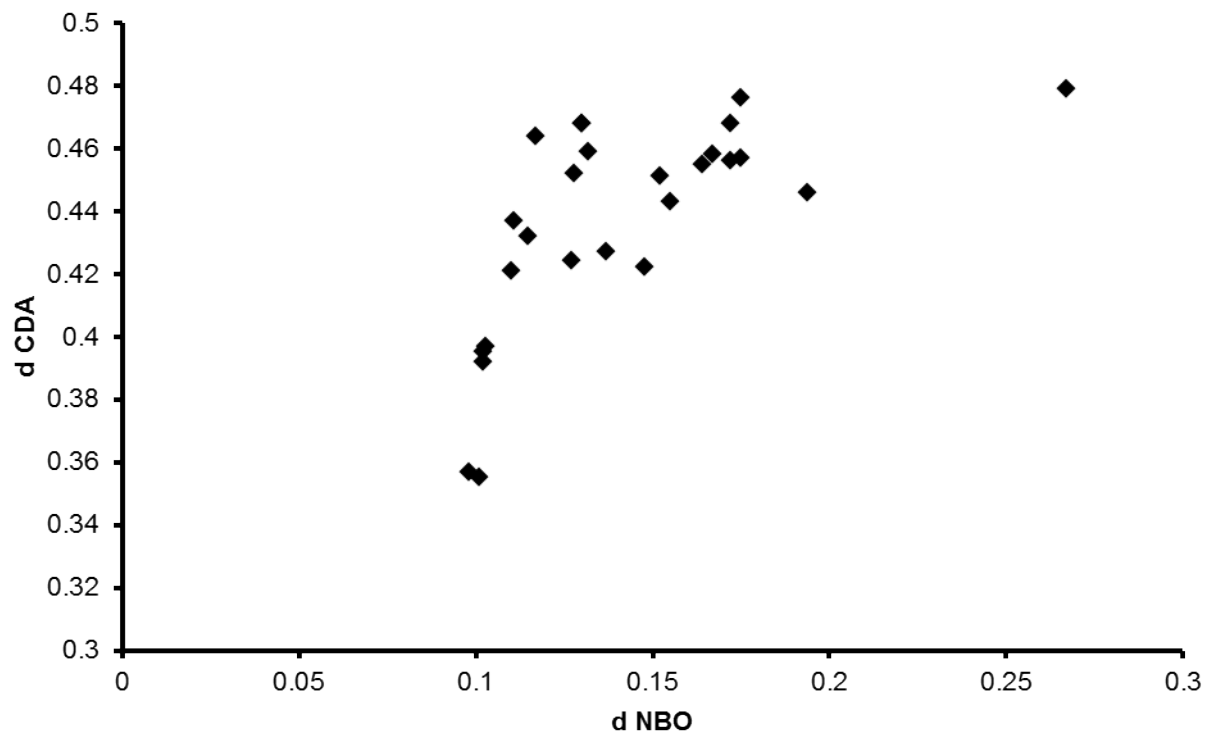

Figure S5: Ethylene→Cu donation (b) computed with CDA and NBO analysis for all complexes (complex **25** is not included).

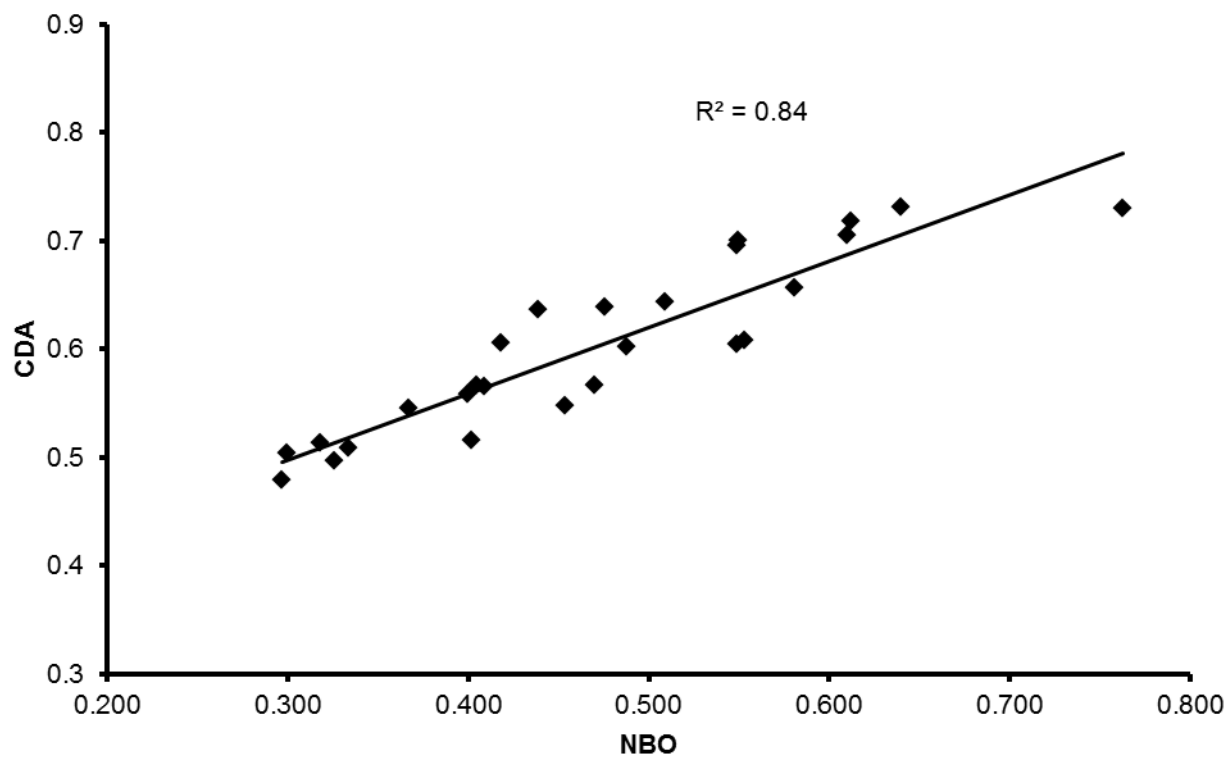

Figure S6: Total electron transfer (donation + back-donation) computed with CDA and NBO analysis for all complexes (complex **25** is not included).

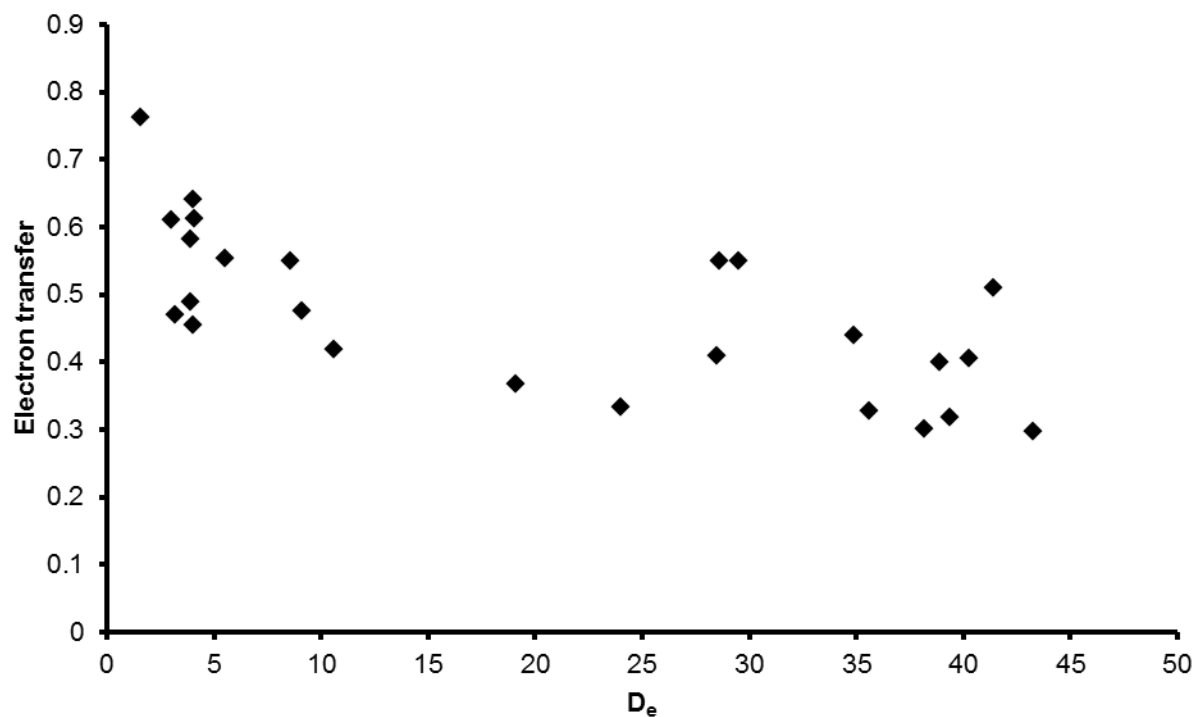

Figure S7: Total electron transfer (donation + back-donation) computed with NBO analysis of the complexes plotted against Bond Dissociation Energies (in kcal/mol).

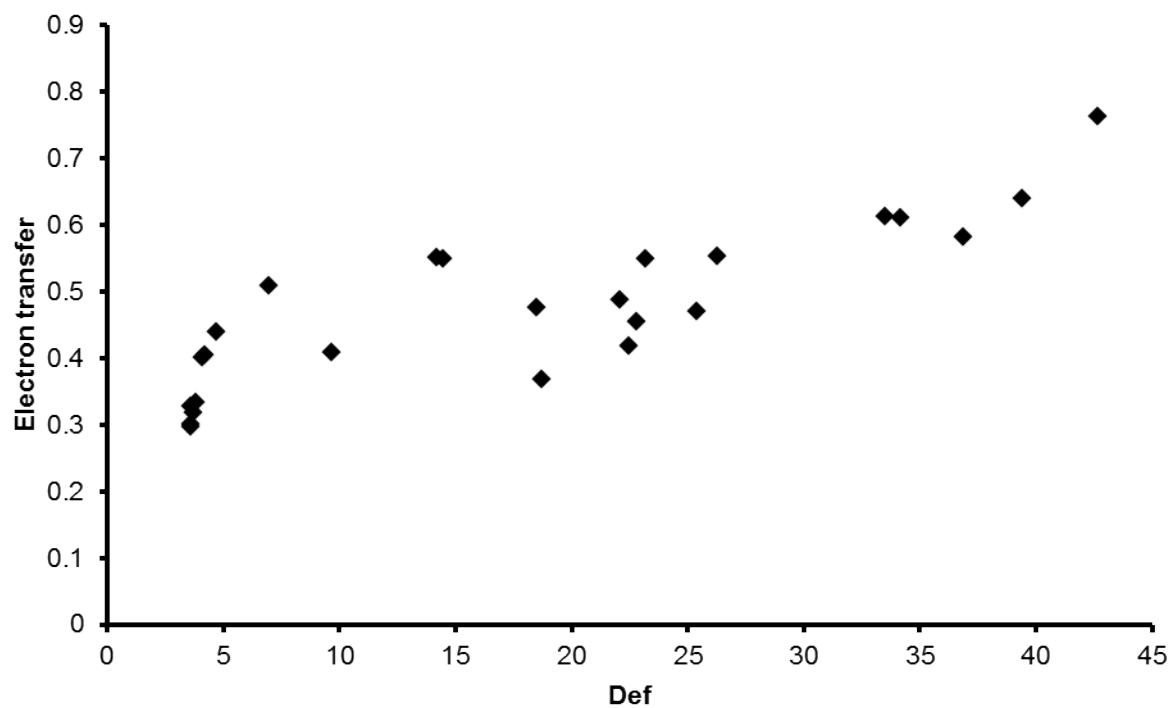

Figure S8: Total electron transfer (donation + back-donation) computed with NBO analysis of the complexes plotted against Deformation Energies (in kcal/mol).

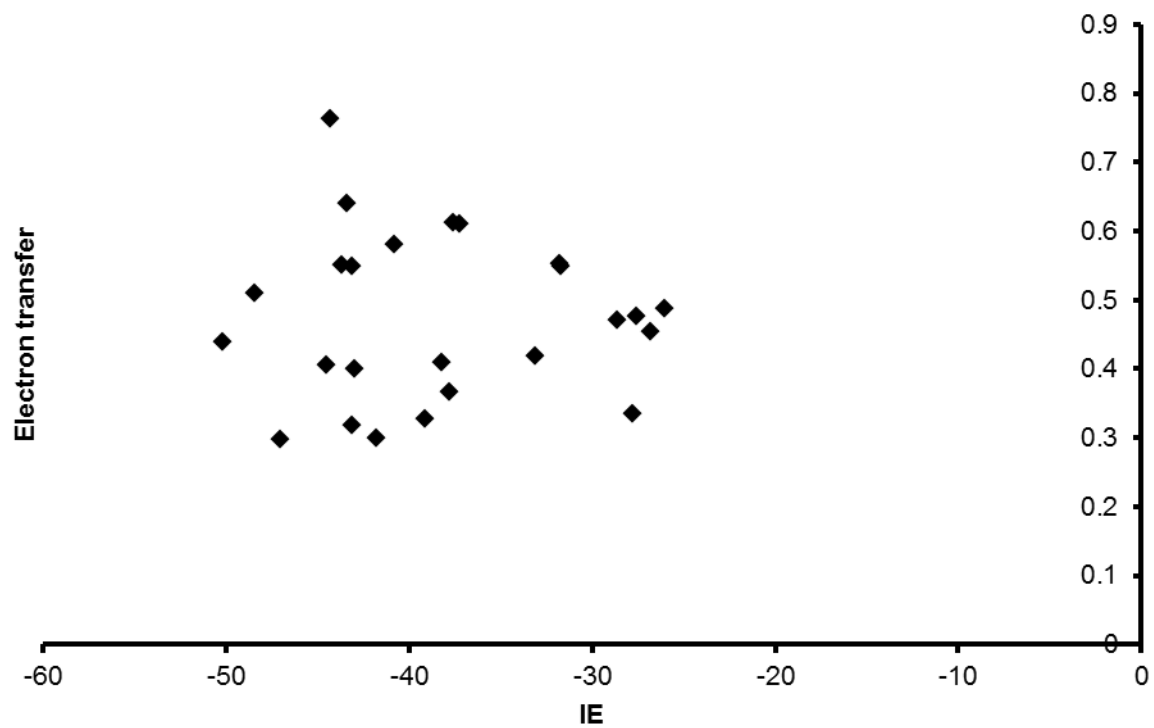

Figure S9: Total electron transfer (donation + back-donation) computed with NBO analysis of the complexes plotted against Interaction Energies (in kcal/mol).

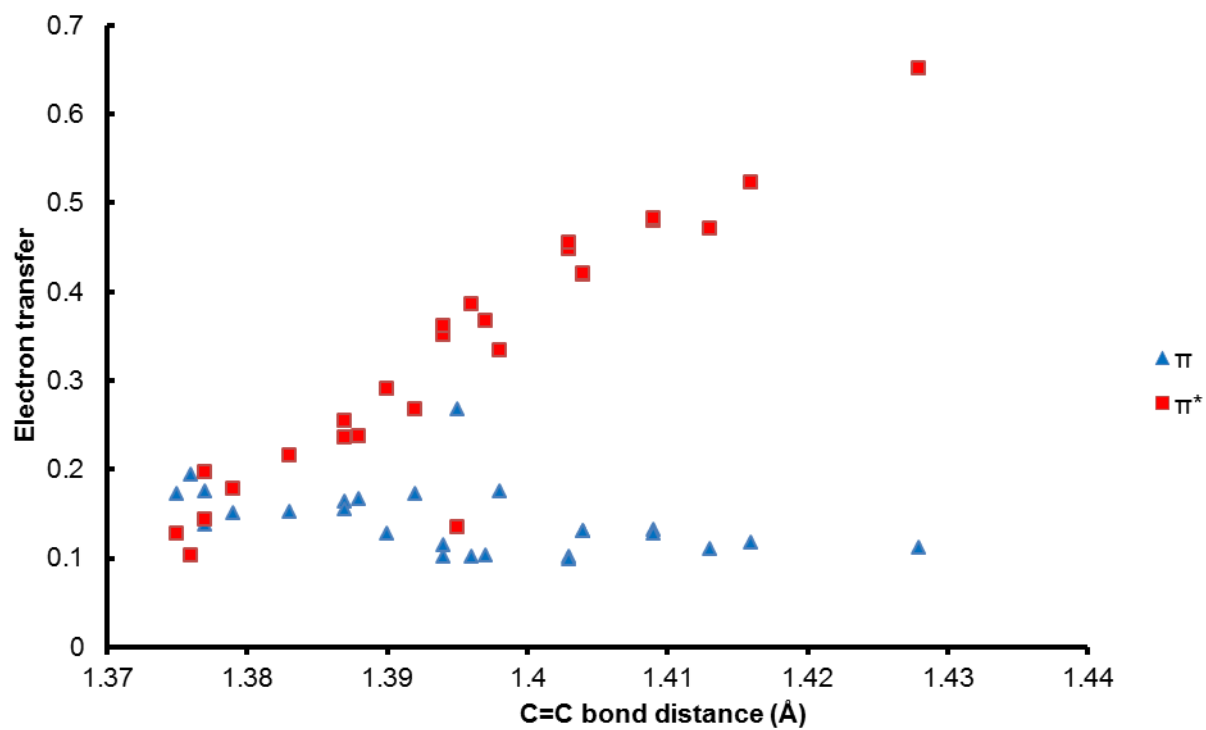

Figure S10: Ethylene→Cu donation and Cu→Ethylene back-donation (defining by the electron occupancies of  $\pi$  and  $\pi^*$  NBO molecular orbital of the ethylene) of the complexes plotted against C=C bond distance (in Å).

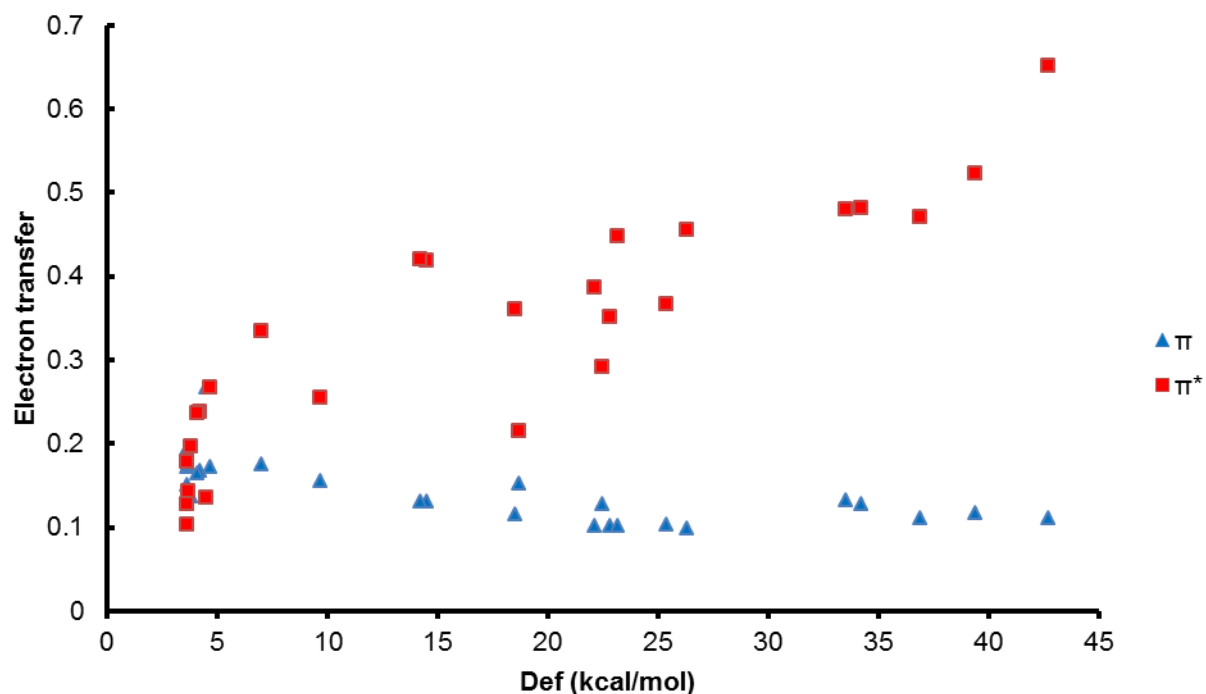

Figure S11: Ethylene $\rightarrow$ Cu donation and Cu $\rightarrow$ Ethylene back-donation (defining by the electron occupancies of  $\pi$  and  $\pi^*$  NBO molecular orbital of the ethylene) of the complexes plotted against Deformation Energies (in kcal/mol).

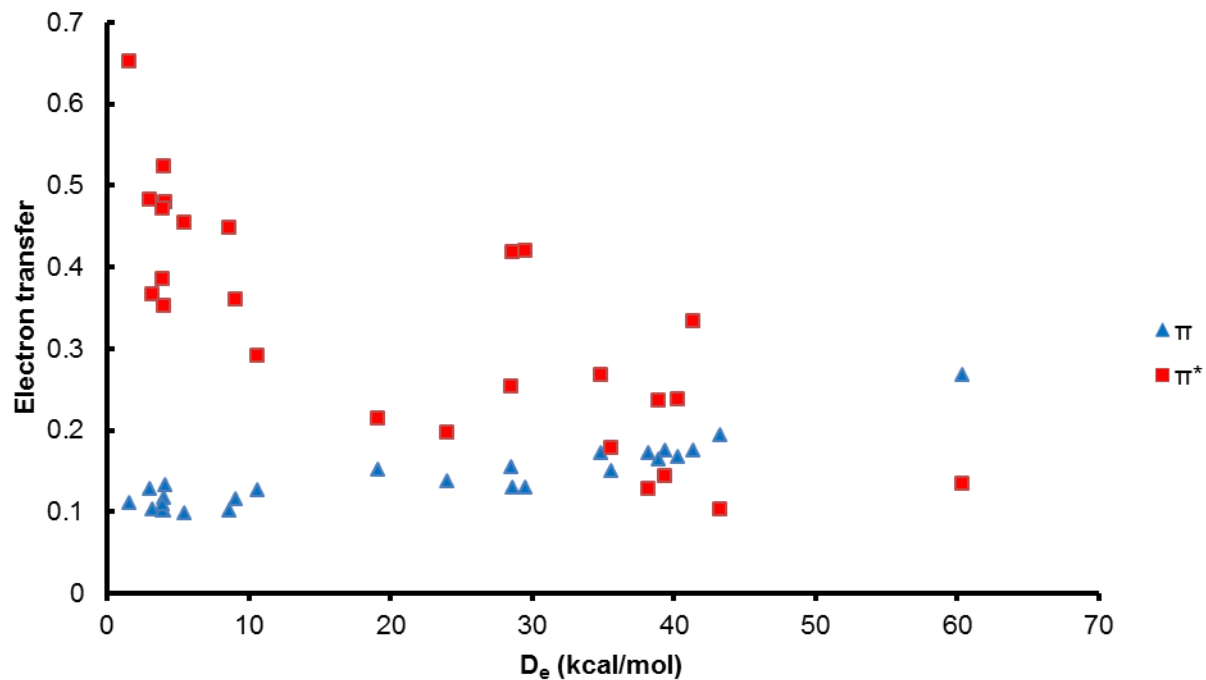

Figure S12: Ethylene $\rightarrow$ Cu donation and Cu $\rightarrow$ Ethylene back-donation (defining by the electron occupancies of  $\pi$  and  $\pi^*$  NBO molecular orbital of the ethylene) of the complexes plotted against Bond Dissociation Energies (in kcal/mol).

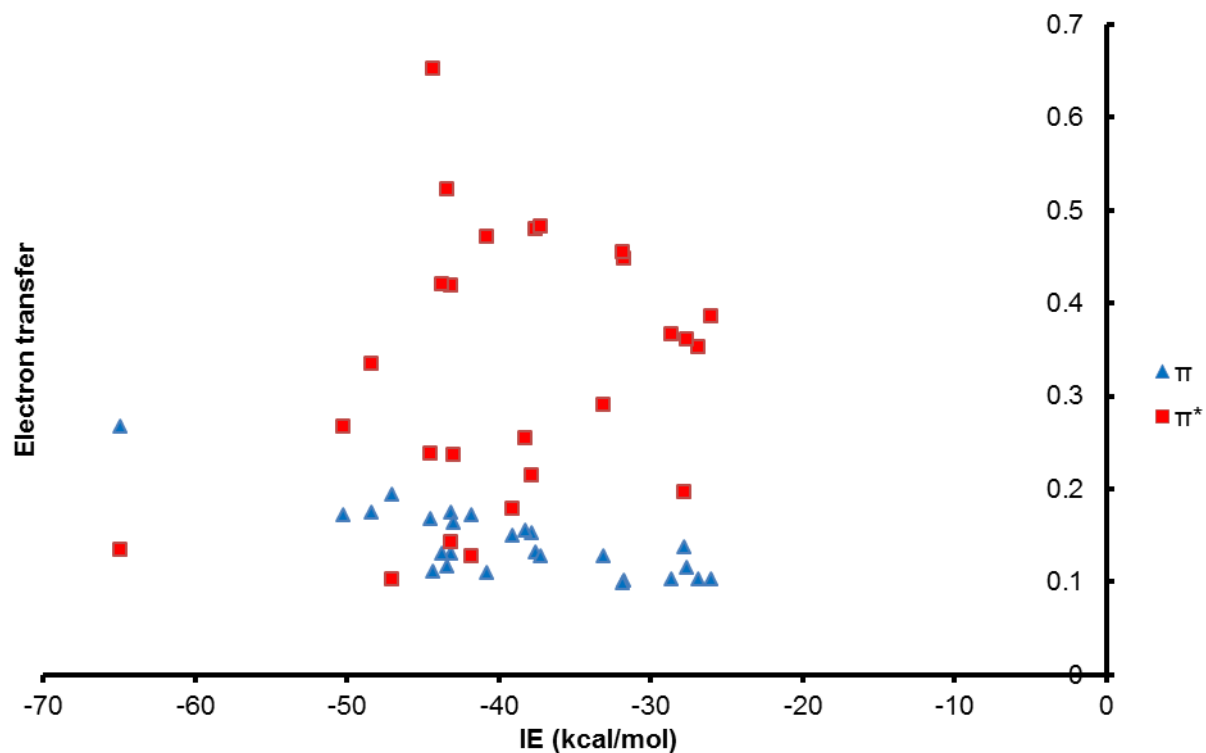

Figure S13: Ethylene $\rightarrow$ Cu donation and Cu $\rightarrow$ Ethylene back-donation (defining by the electron occupancies of  $\pi$  and  $\pi^*$  NBO molecular orbital of the ethylene) of the complexes plotted against Interaction Energies (in kcal/mol).

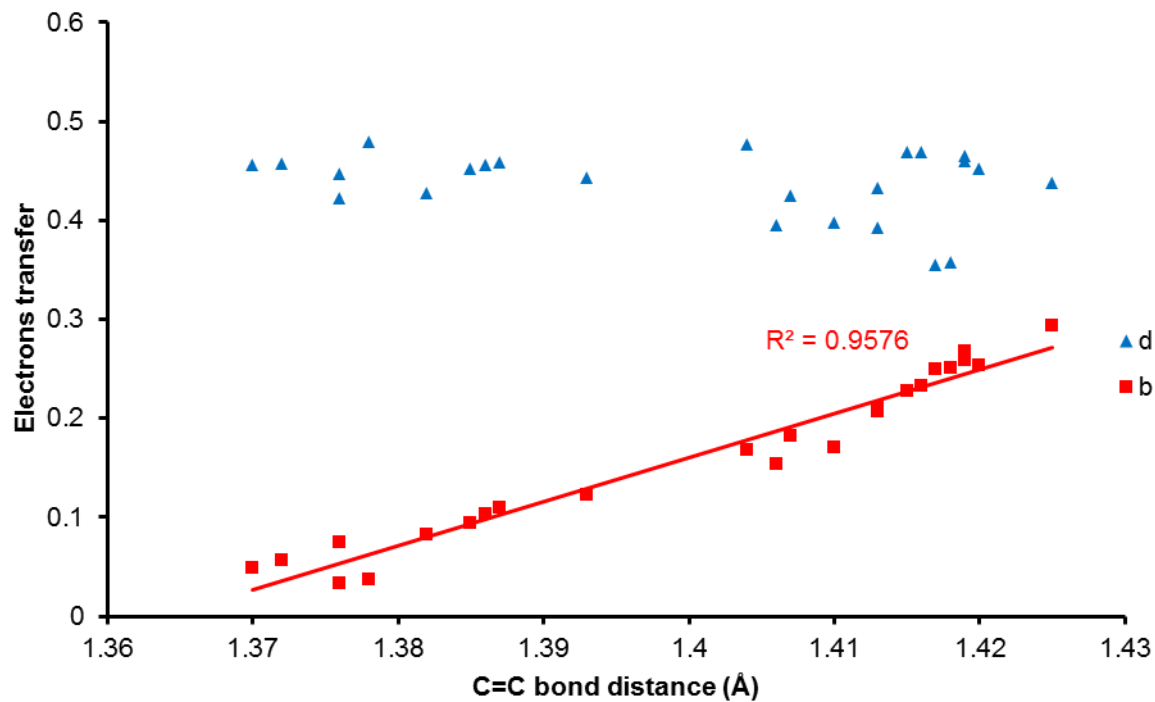

Figure S14: Ethylene $\rightarrow$ Cu donation ( $d$ ) and Cu $\rightarrow$ Ethylene back-donation ( $b$ ) (CDA analysis) of the complexes plotted against C=C bond distances (in Å).



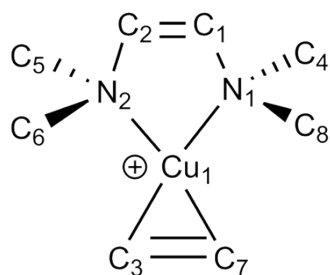

Chart S1: Schematic representation of  $[\text{Cu}(\text{tme})(\text{C}_2\text{H}_4)]^+$  complex, used to compare different methods.

|            | Cu-C <sub>7</sub><br>Cu-C <sub>3</sub> | Cu-N <sub>1</sub><br>Cu-N <sub>2</sub> | C <sub>3</sub> =C <sub>7</sub> | C <sub>1</sub> -N <sub>1</sub><br>C <sub>2</sub> -N <sub>2</sub> | C <sub>4</sub> -N <sub>1</sub><br>C <sub>8</sub> -N <sub>1</sub> | C <sub>5</sub> -N <sub>2</sub><br>C <sub>6</sub> -N <sub>2</sub> | C <sub>2</sub> -C <sub>1</sub> | C <sub>7</sub> -Cu-<br>C <sub>3</sub> | C <sub>7</sub> -Cu-<br>N <sub>2</sub><br>C <sub>3</sub> -Cu-<br>N <sub>2</sub> | C <sub>7</sub> -Cu-<br>N <sub>1</sub><br>C <sub>3</sub> -Cu-<br>N <sub>1</sub> | N <sub>1</sub> -Cu-<br>N <sub>2</sub> |
|------------|----------------------------------------|----------------------------------------|--------------------------------|------------------------------------------------------------------|------------------------------------------------------------------|------------------------------------------------------------------|--------------------------------|---------------------------------------|--------------------------------------------------------------------------------|--------------------------------------------------------------------------------|---------------------------------------|
| Experiment | 1.95(1)<br>1.969(9)                    | 2.010(6)<br>2.037(7)                   | 1.36(1)                        | 1.44(1)<br>1.44(2)                                               | 1.49(1)<br>1.49(2)                                               | 1.50(1)<br>1.46(1)                                               | 1.38(2)                        | 40.6(4)                               | 156.3(4)<br>115.5(4)                                                           | 115.5(4)<br>156.3(4)                                                           | 88.7(3)                               |
| PW91PW91   | 2.005<br>(2.012)<br>2.005<br>(2.012)   | 2.048<br>(2.060)<br>2.048<br>(2.060)   | 1.399<br>(1.399)               | 1.455<br>(1.454)<br>1.455<br>(1.454)                             | 1.497<br>(1.497)<br>1.497<br>(1.496)                             | 1.497<br>(1.497)<br>1.497<br>(1.497)                             | 1.339<br>(1.339)               | 40.8<br>(40.7)                        | 155.7<br>(156.4)<br>114.8<br>(115.7)                                           | 115.1<br>(115.6)<br>155.9<br>(156.3)                                           | 88.3<br>(88.0)                        |
| B3LYP      | 2.051<br>2.051                         | 2.084<br>2.084                         | 1.381                          | 1.451<br>1.451                                                   | 1.494<br>1.494                                                   | 1.494<br>1.494                                                   | 1.331                          | 39.3                                  | 155.9<br>116.6                                                                 | 116.6<br>155.9                                                                 | 87.5                                  |
| B3PW91     | 2.019<br>2.018                         | 2.057<br>2.057                         | 1.383                          | 1.446<br>1.446                                                   | 1.486<br>1.486                                                   | 1.486<br>1.486                                                   | 1.330                          | 40.1                                  | 156.0<br>116.0                                                                 | 116.0<br>156.0                                                                 | 88.0                                  |
| PBEPBE     | 2.004<br>2.004                         | 2.051<br>2.051                         | 1.400                          | 1.456<br>1.456                                                   | 1.497<br>1.497                                                   | 1.497<br>1.497                                                   | 1.340                          | 40.9                                  | 156.3<br>115.4                                                                 | 115.4<br>156.3                                                                 | 88.2                                  |
| M06        | 2.021<br>2.020                         | 2.051<br>2.051                         | 1.378                          | 1.442<br>1.442                                                   | 1.480<br>1.480                                                   | 1.480<br>1.480                                                   | 1.329                          | 39.9                                  | 156.1<br>116.3                                                                 | 116.3<br>156.1                                                                 | 87.6                                  |
| MP2        | 1.895<br>(1.943)<br>1.895<br>(1.943)   | 1.941<br>(1.982)<br>1.941<br>(1.982)   | 1.419<br>(1.414)               | 1.449<br>(1.450)<br>1.449<br>(1.450)                             | 1.489<br>(1.493)<br>1.489<br>(1.493)                             | 1.489<br>(1.493)<br>1.489<br>(1.493)                             | 1.335<br>(1.338)               | 44.0<br>(42.7)                        | 157.0<br>(156.6)<br>113.0<br>(114.0)                                           | 113.0<br>(113.9)<br>156.9<br>(156.6)                                           | 90.1<br>(89.4)                        |

Table S1: Calculated and experimental geometries (distances in Å, angles in degrees) for  $[\text{Cu}(\text{tme})(\text{C}_2\text{H}_4)]^+$  system. A comparison of different functionals (PW91, B3LYP, B3PW91, PBEPBE, M06) and second order Moller Plesset level (MP2).

Cartesian coordinates :

**PW91**

7

1 scf done: -275.726304

|    |           |           |           |
|----|-----------|-----------|-----------|
| C  | -2.208352 | -1.268246 | -0.234828 |
| H  | -1.942723 | -1.703343 | -1.205983 |
| H  | -2.461738 | -1.967874 | 0.570917  |
| C  | -2.475753 | 0.095153  | -0.110004 |
| H  | -2.425994 | 0.760794  | -0.980312 |
| H  | -2.944682 | 0.496246  | 0.796749  |
| Cu | -0.532320 | -0.282701 | 0.399137  |

22

2 scf done: -580.566008

|    |           |           |           |
|----|-----------|-----------|-----------|
| C  | -0.067102 | -0.167449 | 0.726024  |
| C  | 1.774344  | 0.795922  | -0.183490 |
| C  | -0.233657 | 1.191464  | 0.794984  |
| H  | -1.051876 | 1.785747  | 1.189453  |
| H  | -0.712902 | -0.977609 | 1.049798  |
| N  | 1.160699  | -0.387714 | 0.127406  |
| N  | 0.897832  | 1.759614  | 0.236948  |
| C  | 1.717307  | -1.717772 | -0.128643 |
| H  | 2.691766  | -1.601691 | -0.618808 |
| H  | 1.851540  | -2.259021 | 0.818118  |
| H  | 1.047043  | -2.286177 | -0.788058 |
| Cu | 3.470251  | 1.043391  | -1.019547 |
| C  | 4.917895  | 1.298183  | -2.504327 |
| C  | 5.529954  | 1.288405  | -1.271335 |
| H  | 4.644851  | 2.237578  | -2.996816 |
| H  | 4.849480  | 0.390161  | -3.112962 |
| H  | 5.763099  | 2.219657  | -0.744107 |
| H  | 5.967552  | 0.372208  | -0.860659 |
| C  | 1.111295  | 3.203390  | 0.115828  |
| H  | 1.092013  | 3.671231  | 1.109754  |
| H  | 2.091999  | 3.376094  | -0.344284 |
| H  | 0.331565  | 3.648209  | -0.517802 |

24

3 scf done: -581.762009

|    |           |           |           |
|----|-----------|-----------|-----------|
| C  | -0.200089 | -0.255323 | 0.587348  |
| C  | 1.761862  | 0.781993  | -0.178782 |
| C  | -0.222674 | 1.232199  | 0.992220  |
| H  | -0.131302 | 1.378680  | 2.082379  |
| H  | -0.959635 | -0.501697 | -0.174674 |
| N  | 1.152294  | -0.403620 | 0.002840  |
| N  | 0.985602  | 1.761506  | 0.319518  |
| C  | 1.598803  | -1.690240 | -0.505322 |
| H  | 2.617572  | -1.589855 | -0.904001 |
| H  | 1.608051  | -2.437486 | 0.303202  |
| H  | 0.934459  | -2.047086 | -1.310366 |
| Cu | 3.471609  | 1.037818  | -1.019351 |
| C  | 5.226666  | 0.654101  | -2.104577 |
| C  | 5.242225  | 1.958348  | -1.669969 |
| H  | 4.872359  | 0.394475  | -3.108007 |
| H  | 5.728326  | -0.138196 | -1.538470 |
| H  | 4.901763  | 2.775102  | -2.315631 |
| H  | 5.755437  | 2.242496  | -0.744917 |
| C  | 1.337936  | 3.166961  | 0.435470  |
| H  | 1.501308  | 3.446250  | 1.490053  |
| H  | 2.260402  | 3.358165  | -0.129723 |
| H  | 0.534561  | 3.796542  | 0.022827  |
| H  | -1.121502 | 1.762978  | 0.645120  |
| H  | -0.329468 | -0.939106 | 1.439295  |

15

4 scf done: -962.055662

|    |           |           |           |
|----|-----------|-----------|-----------|
| C  | -1.862728 | -1.098911 | 0.522132  |
| H  | -1.596636 | -2.160039 | 0.486922  |
| H  | -2.069244 | -0.681096 | 1.512420  |
| C  | -2.207244 | -0.411735 | -0.627502 |
| H  | -2.222802 | -0.912990 | -1.600344 |
| H  | -2.697094 | 0.565544  | -0.574217 |
| Cu | -0.170671 | -0.059402 | -0.188142 |
| P  | 1.489508  | -0.587677 | 1.290666  |
| H  | 1.164315  | -1.112467 | 2.567821  |
| H  | 2.411274  | -1.579348 | 0.865081  |
| H  | 2.408178  | 0.419924  | 1.683599  |
| P  | 0.483288  | 1.325665  | -1.886578 |
| H  | 0.427780  | 0.792855  | -3.200445 |
| H  | -0.276552 | 2.506647  | -2.088908 |
| H  | 1.786683  | 1.885628  | -1.923741 |

11

5 scf done: -618.911114

|    |           |           |           |
|----|-----------|-----------|-----------|
| C  | -2.295088 | -1.270657 | -0.257622 |
| H  | -2.049005 | -1.715658 | -1.228452 |
| H  | -2.478805 | -1.964378 | 0.570701  |
| C  | -2.570579 | 0.072210  | -0.137874 |
| H  | -2.551979 | 0.735712  | -1.009954 |
| H  | -2.981894 | 0.487171  | 0.789358  |
| Cu | -0.537842 | -0.254306 | 0.303118  |
| P  | 1.589298  | 0.126609  | 0.860779  |
| H  | 1.965647  | 1.483975  | 1.009310  |
| H  | 2.044116  | -0.422403 | 2.084455  |
| H  | 2.579879  | -0.337768 | -0.038631 |

45

6 scf done: -1730.005046

|   |           |           |           |
|---|-----------|-----------|-----------|
| C | -6.221232 | -0.172168 | 3.628183  |
| C | -5.226465 | -0.388300 | 2.687531  |
| C | -4.907964 | 0.610591  | 1.720321  |
| C | -5.649466 | 1.848991  | 1.740240  |
| C | -6.661057 | 2.039828  | 2.724486  |
| C | -6.942424 | 1.050384  | 3.651436  |
| H | -6.451562 | -0.948701 | 4.360874  |
| C | -3.883608 | 0.418058  | 0.727831  |
| C | -5.351645 | 2.853740  | 0.777982  |
| H | -7.213003 | 2.983327  | 2.734237  |
| C | -4.375624 | 2.653174  | -0.180242 |
| C | -3.637699 | 1.433561  | -0.206579 |
| H | -5.905893 | 3.795492  | 0.805157  |
| H | -4.162190 | 3.438416  | -0.909743 |
| C | -3.080862 | -0.849434 | 0.732283  |
| C | -2.031418 | -1.019402 | 1.702362  |
| C | -3.352129 | -1.887058 | -0.170257 |
| C | -1.685742 | 0.002973  | 2.635117  |
| C | -1.292714 | -2.259236 | 1.734979  |
| C | -2.615865 | -3.107343 | -0.132519 |
| C | -0.668469 | -0.192601 | 3.555982  |
| C | -0.257727 | -2.428550 | 2.698593  |
| C | -1.616901 | -3.286898 | 0.805995  |
| H | -2.848940 | -3.909672 | -0.836971 |
| C | 0.049335  | -1.416837 | 3.592760  |
| H | -0.417538 | 0.601597  | 4.262497  |
| H | 0.291626  | -3.373395 | 2.718807  |
| H | -1.064357 | -4.229313 | 0.843053  |
| H | -7.719988 | 1.207232  | 4.401972  |
| H | 0.844634  | -1.557349 | 4.327784  |
| P | -2.494663 | 1.141818  | -1.607101 |
| H | -2.126343 | 2.463504  | -1.973321 |

H -1.276677 0.710178 -1.016081  
P -4.531109 -1.628052 -1.547001  
H -4.909996 -2.957781 -1.870951  
H -5.732698 -1.180092 -0.934913  
H -2.233326 0.947451 2.622020  
H -4.675817 -1.331027 2.685409  
Cu -3.529405 -0.263412 -3.090026  
C -3.984189 -0.832295 -5.039470  
H -3.618884 -1.857824 -5.150131  
H -5.062812 -0.687816 -5.154278  
C -3.110297 0.244973 -5.064012  
H -3.477568 1.266733 -5.200022  
H -2.033922 0.096377 -5.193809

8

7 scf done: -375.866301  
C -2.146044 -1.253925 -0.222782  
H -1.939975 -1.703313 -1.199508  
H -2.365599 -1.949602 0.593605  
C -2.418869 0.105292 -0.100783  
H -2.432819 0.760564 -0.977724  
H -2.857622 0.513741 0.815421  
Cu -0.492774 -0.254059 0.313631  
F 1.178460 0.079954 0.778141

8

8 scf done: -736.240631  
C -2.193673 -1.259130 -0.232445  
H -1.968322 -1.707061 -1.205516  
H -2.398610 -1.954698 0.587640  
C -2.475519 0.094190 -0.112833  
H -2.479911 0.751130 -0.988459  
H -2.910775 0.503174 0.804566  
Cu -0.520267 -0.247285 0.310116  
Cl 1.471834 0.118331 0.836930

8

9 scf done: -2847.612867  
C -2.210084 -1.261975 -0.236534  
H -1.984607 -1.710110 -1.209374  
H -2.410906 -1.956692 0.585265  
C -2.493075 0.090579 -0.117159  
H -2.498606 0.747111 -0.992998  
H -2.924660 0.499892 0.801736  
Cu -0.531212 -0.248110 0.306187  
Br 1.577907 0.137957 0.862878

11

10 scf done: -315.892367  
C -2.235978 -1.259746 -0.242746  
H -1.990787 -1.706816 -1.210941  
H -2.422816 -1.955401 0.580991  
C -2.510826 0.084093 -0.122737  
H -2.492445 0.749144 -0.991520  
H -2.924489 0.500772 0.800674  
Cu -0.490700 -0.249286 0.317578  
C 1.329430 0.071350 0.797431  
H 2.015065 -0.172227 -0.031956  
H 1.474803 1.136709 1.050494  
H 1.625121 -0.524203 1.677977

12

11 scf done: -391.111300  
C -2.235690 -1.286093 -0.318324  
H -1.896291 -1.706129 -1.270608  
H -2.539059 -2.009851 0.444688  
C -2.579115 0.064256 -0.208719

H -2.516476 0.734055 -1.072368  
H -3.159849 0.432116 0.643068  
Cu -0.707547 -0.234425 0.431015  
O 0.940646 0.153134 0.955075  
C 1.442837 0.168600 2.274862  
H 1.953644 1.132681 2.469240  
H 0.672258 0.035176 3.059718  
H 2.195937 -0.634233 2.406774

9

12 scf done: -368.836516  
C -2.202296 -1.256224 -0.233970  
H -1.956875 -1.702562 -1.203044  
H -2.388730 -1.951020 0.591296  
C -2.482241 0.088515 -0.115211  
H -2.467649 0.751449 -0.986335  
H -2.899563 0.503116 0.808109  
Cu -0.486385 -0.241004 0.319393  
C 1.278581 0.080927 0.785339  
N 2.402669 0.285366 1.081413

28

13 scf done: -621.827065  
C 0.155887 -0.250682 0.924512  
C 1.729940 1.076168 -0.224991  
C -0.535756 1.028057 0.428603  
H -1.105026 1.549474 1.213691  
H -0.393640 -1.170769 0.672815  
N 1.444719 -0.182611 0.211034  
N 0.617034 1.828034 -0.017226  
C 2.454698 -1.199256 0.428857  
H 3.319896 -0.973484 -0.208940  
H 2.789756 -1.221868 1.483059  
H 2.059682 -2.192915 0.162251  
Cu 3.434648 1.760451 -0.825264  
C 3.783194 1.165796 -2.781097  
C 4.831228 1.946787 -2.255603  
H 3.024040 1.607961 -3.432731  
H 3.859946 0.075215 -2.823732  
H 4.916161 3.009804 -2.499677  
H 5.749518 1.482369 -1.883753  
C 0.440400 3.164341 -0.548873  
H -0.121464 3.785136 0.167326  
H 1.434377 3.608731 -0.700987  
H -0.104221 3.155339 -1.511955  
C 4.268609 2.782813 0.662281  
H 4.878462 3.632522 0.311020  
H 3.517180 3.163126 1.376421  
H 4.940968 2.103055 1.218536  
H -1.216243 0.827644 -0.422619  
H 0.325093 -0.232011 2.019474

26

14 scf done: -620.628447  
C 0.046268 -0.254028 0.618292  
C 1.727456 1.047804 -0.234226  
C -0.464869 1.000450 0.425527  
H -1.459393 1.396832 0.603828  
H -0.413317 -1.155305 1.011226  
N 1.373784 -0.205798 0.204746  
N 0.571042 1.774732 -0.083949  
C 2.307086 -1.321247 0.282446  
H 3.151120 -1.101481 -0.383983  
H 2.682369 -1.450083 1.309557  
H 1.812924 -2.247479 -0.044999  
Cu 3.453981 1.766361 -0.761997  
C 4.102393 0.848669 -2.515797

|   |           |           |           |
|---|-----------|-----------|-----------|
| C | 4.995573  | 1.829723  | -2.042836 |
| H | 3.391456  | 1.072418  | -3.316076 |
| H | 4.300416  | -0.214492 | -2.348333 |
| H | 5.010236  | 2.833240  | -2.478645 |
| H | 5.900263  | 1.550160  | -1.494629 |
| C | 0.464242  | 3.182482  | -0.449730 |
| H | 1.474814  | 3.614426  | -0.414961 |
| H | 0.050117  | 3.295485  | -1.463745 |
| H | -0.183832 | 3.703594  | 0.269111  |
| C | 4.028463  | 3.167732  | 0.533778  |
| H | 4.216584  | 4.133953  | 0.030833  |
| H | 3.297188  | 3.336814  | 1.344222  |
| H | 4.981104  | 2.863078  | 1.003767  |

49

15 scf done: -1770.054088

|    |           |           |           |
|----|-----------|-----------|-----------|
| C  | -6.011137 | -0.334605 | 4.111263  |
| C  | -5.091634 | -0.505778 | 3.087789  |
| C  | -5.057609 | 0.386767  | 1.975298  |
| C  | -6.005397 | 1.472905  | 1.939564  |
| C  | -6.932519 | 1.623731  | 3.009776  |
| C  | -6.939211 | 0.738988  | 4.076169  |
| H  | -6.021728 | -1.032404 | 4.952144  |
| C  | -4.124968 | 0.226418  | 0.891857  |
| C  | -5.992370 | 2.364301  | 0.829088  |
| H  | -7.645804 | 2.452150  | 2.971643  |
| C  | -5.097645 | 2.189175  | -0.208762 |
| C  | -4.152672 | 1.120262  | -0.187960 |
| H  | -6.705408 | 3.193521  | 0.807493  |
| H  | -5.108740 | 2.880497  | -1.055726 |
| C  | -3.126749 | -0.891258 | 0.915879  |
| C  | -1.937986 | -0.767415 | 1.717101  |
| C  | -3.333168 | -2.043066 | 0.144327  |
| C  | -1.664350 | 0.393306  | 2.500677  |
| C  | -0.973724 | -1.838986 | 1.721363  |
| C  | -2.364646 | -3.090188 | 0.154870  |
| C  | -0.503732 | 0.488698  | 3.253136  |
| C  | 0.205756  | -1.711294 | 2.509599  |
| C  | -1.222846 | -2.993479 | 0.926949  |
| H  | -2.528965 | -3.977670 | -0.460554 |
| C  | 0.439879  | -0.571709 | 3.261983  |
| H  | -0.313694 | 1.388007  | 3.844183  |
| H  | 0.929202  | -2.531703 | 2.504965  |
| H  | -0.490166 | -3.805611 | 0.928879  |
| H  | -7.658267 | 0.863491  | 4.889310  |
| H  | 1.350294  | -0.485015 | 3.859841  |
| P  | -3.141783 | 0.788501  | -1.691377 |
| H  | -3.050404 | 2.122500  | -2.191753 |
| H  | -1.827728 | 0.727720  | -1.138343 |
| P  | -4.758882 | -2.125334 | -1.027796 |
| H  | -4.791605 | -3.541752 | -1.197664 |
| H  | -5.833731 | -2.080814 | -0.073040 |
| H  | -2.384222 | 1.214604  | 2.500197  |
| H  | -4.380828 | -1.334268 | 3.122578  |
| Cu | -3.930955 | -0.921702 | -3.019143 |
| C  | -2.478494 | -2.170224 | -3.550562 |
| H  | -2.879191 | -3.139617 | -3.894833 |
| H  | -1.909618 | -1.728758 | -4.387590 |
| H  | -1.769145 | -2.360913 | -2.726818 |
| C  | -5.675890 | 0.061569  | -3.839883 |
| H  | -6.516211 | -0.142278 | -3.172768 |
| C  | -5.162099 | -0.924078 | -4.680371 |
| H  | -5.594028 | -1.928253 | -4.703732 |
| H  | -4.510062 | -0.667746 | -5.519357 |
| H  | -5.432795 | 1.114935  | -4.002375 |

30

16 scf done: -735.157357

|    |           |           |           |
|----|-----------|-----------|-----------|
| C  | -0.087906 | -0.248583 | 0.502392  |
| C  | 1.787842  | 0.980222  | -0.222544 |
| C  | -0.427239 | 1.250390  | 0.520045  |
| H  | -0.837778 | 1.593868  | 1.481272  |
| H  | -0.826111 | -0.858273 | -0.040947 |
| N  | 1.216944  | -0.253122 | -0.188316 |
| N  | 0.892611  | 1.863822  | 0.262932  |
| C  | 1.921625  | -1.500544 | -0.397952 |
| H  | 2.857474  | -1.282557 | -0.926518 |
| H  | 2.157375  | -1.997974 | 0.562004  |
| H  | 1.310466  | -2.188440 | -1.005270 |
| C  | 1.067401  | 3.330809  | 0.266198  |
| H  | 0.342475  | 3.707755  | 1.011692  |
| C  | 2.484911  | 3.709407  | 0.776834  |
| H  | 2.584975  | 3.247992  | 1.791513  |
| H  | 2.453410  | 4.812677  | 0.940290  |
| O  | 3.531386  | 3.389511  | -0.071889 |
| Cu | 3.542910  | 1.618045  | -0.805284 |
| C  | 4.689777  | 0.405188  | -1.975233 |
| C  | 5.314119  | 1.640212  | -1.740771 |
| H  | 4.160845  | 0.211223  | -2.913891 |
| H  | 4.997470  | -0.483042 | -1.413288 |
| H  | 5.254817  | 2.454810  | -2.468403 |
| H  | 6.076179  | 1.751140  | -0.964182 |
| C  | 0.752425  | 3.933727  | -1.109735 |
| H  | -0.227423 | 3.604387  | -1.491565 |
| H  | 0.743317  | 5.032881  | -1.044210 |
| H  | 1.536062  | 3.643621  | -1.825600 |
| H  | 0.024195  | -0.665533 | 1.522284  |
| H  | -1.137386 | 1.526849  | -0.281447 |

28

17 scf done: -733.963127

|    |           |           |           |
|----|-----------|-----------|-----------|
| C  | -0.084104 | -0.142704 | 0.417820  |
| C  | 1.783069  | 0.982852  | -0.262369 |
| C  | -0.314542 | 1.195927  | 0.599175  |
| H  | -1.183022 | 1.719726  | 0.986019  |
| H  | -0.709476 | -1.006447 | 0.619342  |
| N  | 1.196555  | -0.249214 | -0.109015 |
| N  | 0.831435  | 1.858717  | 0.188502  |
| C  | 1.851694  | -1.510377 | -0.431367 |
| H  | 2.784771  | -1.274351 | -0.956643 |
| H  | 2.080969  | -2.074802 | 0.485499  |
| H  | 1.205475  | -2.118719 | -1.081293 |
| C  | 1.008385  | 3.333246  | 0.213443  |
| H  | 0.260502  | 3.701390  | 0.938214  |
| C  | 2.419274  | 3.694525  | 0.757847  |
| H  | 2.503467  | 3.208163  | 1.762260  |
| H  | 2.381453  | 4.793032  | 0.949718  |
| O  | 3.474596  | 3.398170  | -0.085814 |
| Cu | 3.532996  | 1.622804  | -0.824469 |
| C  | 4.727117  | 0.412065  | -1.944948 |
| C  | 5.332712  | 1.654504  | -1.699265 |
| H  | 4.235335  | 0.206226  | -2.901104 |
| H  | 5.020630  | -0.469016 | -1.364285 |
| H  | 5.294261  | 2.460779  | -2.437602 |
| H  | 6.066887  | 1.778230  | -0.898129 |
| C  | 0.736416  | 3.929550  | -1.170515 |
| H  | -0.243172 | 3.616355  | -1.564060 |
| H  | 0.754712  | 5.028391  | -1.105975 |
| H  | 1.527161  | 3.620262  | -1.869582 |

29

18 scf done: -1170.779810

|   |           |          |          |
|---|-----------|----------|----------|
| C | -1.198832 | 1.428537 | 0.698042 |
|---|-----------|----------|----------|

|    |           |           |           |
|----|-----------|-----------|-----------|
| C  | -0.265041 | 1.427774  | -0.376212 |
| C  | -0.374020 | 2.398922  | -1.392555 |
| C  | -1.386343 | 3.363495  | -1.356482 |
| C  | -2.310076 | 3.362678  | -0.299945 |
| C  | -2.214870 | 2.400097  | 0.716729  |
| H  | 0.350333  | 2.389999  | -2.212177 |
| H  | -1.455691 | 4.113528  | -2.147539 |
| H  | -3.103665 | 4.112510  | -0.262139 |
| H  | -2.938427 | 2.410460  | 1.536426  |
| P  | -1.174048 | 0.098655  | 1.968244  |
| H  | -0.106402 | 0.398472  | 2.851226  |
| H  | -2.243830 | 0.631001  | 2.770756  |
| C  | 0.797587  | 0.424302  | -0.414451 |
| N  | 0.939176  | -0.373276 | 0.588513  |
| C  | 1.937228  | -1.409540 | 0.590429  |
| H  | 2.591062  | -1.379270 | -0.302106 |
| H  | 2.576491  | -1.274409 | 1.479895  |
| C  | 1.398240  | -2.880115 | 0.715465  |
| O  | 2.256814  | -3.758971 | 0.573985  |
| O  | 0.142423  | -3.089506 | 0.965070  |
| H  | 1.451168  | 0.381762  | -1.307017 |
| Cu | -1.436203 | -2.012819 | 1.181807  |
| C  | -3.476336 | -2.224541 | 0.948126  |
| C  | -2.827088 | -3.372163 | 0.507207  |
| H  | -3.807672 | -1.457612 | 0.241001  |
| H  | -3.911122 | -2.171840 | 1.951098  |
| H  | -2.592953 | -3.524555 | -0.550050 |
| H  | -2.691655 | -4.240337 | 1.158212  |

9

**19** scf done: -475.772286

|    |           |           |           |
|----|-----------|-----------|-----------|
| C  | -2.246135 | 0.430922  | 1.207318  |
| H  | -2.552790 | -0.355024 | 1.905620  |
| H  | -2.234631 | 1.446155  | 1.617808  |
| C  | -2.236162 | 0.206360  | -0.187210 |
| H  | -2.534357 | -0.759881 | -0.607796 |
| H  | -2.216506 | 1.041143  | -0.895832 |
| Cu | -0.417385 | 0.003899  | 0.574136  |
| F  | 0.685129  | -0.429327 | -0.905660 |
| F  | 0.660761  | 0.056715  | 2.132580  |

9

**20** scf done: -1196.535408

|    |           |           |           |
|----|-----------|-----------|-----------|
| C  | -2.308477 | 0.439978  | 1.197298  |
| H  | -2.575287 | -0.352191 | 1.902636  |
| H  | -2.254148 | 1.449756  | 1.613987  |
| C  | -2.298511 | 0.217788  | -0.181419 |
| H  | -2.556569 | -0.756661 | -0.605876 |
| H  | -2.236198 | 1.045436  | -0.893691 |
| Cu | -0.415690 | 0.002839  | 0.574278  |
| Cl | 0.764574  | -0.501784 | -1.282386 |
| Cl | 0.733805  | 0.105222  | 2.514339  |

9

**21** scf done: -5419.284704

|    |           |           |           |
|----|-----------|-----------|-----------|
| C  | -2.318752 | 0.442848  | 1.195453  |
| H  | -2.581214 | -0.348291 | 1.903249  |
| H  | -2.259028 | 1.452783  | 1.610569  |
| C  | -2.309133 | 0.218257  | -0.180162 |
| H  | -2.562657 | -0.757933 | -0.602910 |
| H  | -2.241458 | 1.043306  | -0.894607 |
| Cu | -0.409461 | 0.001925  | 0.574741  |
| Br | 0.811961  | -0.524012 | -1.408411 |
| Br | 0.777665  | 0.112079  | 2.643042  |

15

**22** scf done: -355.800991

|    |           |           |           |
|----|-----------|-----------|-----------|
| C  | -1.239005 | -1.869263 | 0.106390  |
| H  | -0.571684 | -2.571877 | 0.619003  |
| H  | -2.202966 | -1.707611 | 0.602780  |
| C  | -1.078829 | -1.592593 | -1.285139 |
| H  | -0.285000 | -2.077174 | -1.865404 |
| H  | -1.917000 | -1.214297 | -1.881960 |
| Cu | -0.299379 | -0.103556 | -0.167403 |
| C  | 0.090764  | 0.642195  | 1.650074  |
| H  | -0.315059 | 0.072382  | 2.509437  |
| H  | 1.190957  | 0.708173  | 1.774993  |
| H  | -0.302628 | 1.677191  | 1.707274  |
| C  | 0.428994  | 1.259557  | -1.441101 |
| H  | 1.493439  | 1.449855  | -1.195662 |
| H  | 0.365390  | 1.003555  | -2.517321 |
| H  | -0.113097 | 2.214560  | -1.285351 |

17

**23** scf done: -506.249758

|    |           |           |           |
|----|-----------|-----------|-----------|
| C  | -1.755209 | -0.803402 | 0.899408  |
| H  | -1.514894 | -1.806801 | 1.269943  |
| H  | -2.019070 | -0.073878 | 1.673948  |
| C  | -2.107894 | -0.589752 | -0.455457 |
| H  | -2.149894 | -1.422841 | -1.166724 |
| H  | -2.653681 | 0.310153  | -0.762144 |
| Cu | -0.208672 | -0.110591 | -0.133551 |
| O  | 1.275600  | 0.046685  | 1.072827  |
| C  | 1.131294  | -0.302991 | 2.401781  |
| H  | 0.868708  | -1.383132 | 2.578765  |
| H  | 2.087530  | -0.133356 | 2.960131  |
| H  | 0.349566  | 0.282811  | 2.960564  |
| O  | 0.539026  | 0.493659  | -1.793072 |
| C  | -0.242928 | 0.554211  | -2.930674 |
| H  | -1.122928 | 1.252393  | -2.860288 |
| H  | 0.357890  | 0.919034  | -3.802954 |
| H  | -0.676861 | -0.431656 | -3.256789 |

33

**24** scf done: -1210.702625

|    |           |           |           |
|----|-----------|-----------|-----------|
| C  | -1.011139 | 1.202591  | 0.848081  |
| C  | -0.390188 | 1.195838  | -0.436085 |
| C  | -0.840759 | 2.088172  | -1.433845 |
| C  | -1.883173 | 2.985805  | -1.185610 |
| C  | -2.504728 | 2.989940  | 0.074960  |
| C  | -2.071449 | 2.102035  | 1.070774  |
| H  | -0.356576 | 2.064110  | -2.415599 |
| H  | -2.215490 | 3.672777  | -1.968849 |
| H  | -3.326923 | 3.680565  | 0.282818  |
| H  | -2.568954 | 2.104495  | 2.045211  |
| P  | -0.590601 | -0.083935 | 2.104803  |
| H  | 0.620705  | 0.421736  | 2.668408  |
| H  | -1.455772 | 0.466063  | 3.125986  |
| C  | 0.699954  | 0.269849  | -0.723368 |
| N  | 1.222688  | -0.432887 | 0.224686  |
| C  | 2.239915  | -1.399665 | -0.067395 |
| H  | 2.600371  | -1.340592 | -1.114040 |
| H  | 3.097342  | -1.222398 | 0.605405  |
| C  | 1.855607  | -2.927718 | 0.212125  |
| O  | 2.674895  | -3.723430 | -0.310243 |
| O  | 0.845988  | -3.170471 | 0.936084  |
| H  | 1.046944  | 0.191363  | -1.775023 |
| Cu | -1.102590 | -2.238346 | 1.629985  |
| C  | -2.393515 | -2.328813 | 0.122216  |
| H  | -2.196381 | -1.545081 | -0.632951 |
| H  | -2.292153 | -3.311344 | -0.373950 |
| H  | -3.443901 | -2.220648 | 0.452877  |
| C  | -1.555166 | -3.857001 | 2.814348  |
| H  | -1.192554 | -4.677895 | 2.189461  |

|   |           |           |          |
|---|-----------|-----------|----------|
| C | -0.657290 | -3.088246 | 3.557177 |
| H | -1.009566 | -2.427238 | 4.355293 |
| H | 0.416127  | -3.281493 | 3.500857 |
| H | -2.629898 | -3.832615 | 3.016554 |

34

25 scf done: -775.039858

|    |           |           |           |
|----|-----------|-----------|-----------|
| C  | -0.200071 | -0.065605 | 0.727514  |
| C  | 1.690019  | 1.047269  | -0.157603 |
| C  | -0.575736 | 1.387038  | 0.405763  |
| H  | -1.069180 | 1.907520  | 1.243333  |
| H  | -0.931675 | -0.802823 | 0.355389  |
| N  | 1.093984  | -0.186020 | 0.041141  |
| N  | 0.740542  | 1.979695  | 0.114133  |
| C  | 1.878488  | -1.388643 | 0.219589  |
| H  | 2.868465  | -1.209444 | -0.225481 |
| H  | 2.026456  | -1.623774 | 1.293144  |
| H  | 1.387996  | -2.251530 | -0.267246 |
| C  | 0.853803  | 3.419034  | -0.177801 |
| H  | 0.027875  | 3.899536  | 0.386427  |
| C  | 2.205583  | 4.016805  | 0.362253  |
| H  | 2.207863  | 3.757996  | 1.466143  |
| H  | 2.022609  | 5.138546  | 0.329149  |
| O  | 3.304011  | 3.627052  | -0.315570 |
| Cu | 3.578867  | 1.395781  | -0.348344 |
| C  | 4.244784  | 1.558854  | -2.351915 |
| C  | 5.299137  | 1.512146  | -1.427953 |
| H  | 3.838994  | 2.521310  | -2.672010 |
| H  | 3.952176  | 0.673187  | -2.925343 |
| H  | 5.742413  | 2.439853  | -1.054006 |
| H  | 5.882984  | 0.598246  | -1.277303 |
| C  | 0.692523  | 3.686602  | -1.680642 |
| H  | -0.218122 | 3.220744  | -2.096835 |
| H  | 0.645771  | 4.772934  | -1.866182 |
| H  | 1.580548  | 3.286666  | -2.192423 |
| C  | 4.429191  | 0.807098  | 1.398557  |
| H  | 5.035141  | -0.115283 | 1.293276  |
| H  | 5.102867  | 1.621487  | 1.724002  |
| H  | 3.689339  | 0.637069  | 2.204448  |
| H  | -0.075181 | -0.222018 | 1.821956  |
| H  | -1.239788 | 1.452309  | -0.481509 |

32

26 scf done: -773.845314

|    |           |           |           |
|----|-----------|-----------|-----------|
| C  | -0.232863 | 0.066372  | 0.703032  |
| C  | 1.671785  | 1.054394  | -0.133339 |
| C  | -0.499412 | 1.398621  | 0.515308  |
| H  | -1.398607 | 1.975803  | 0.711958  |
| H  | -0.856539 | -0.737012 | 1.084367  |
| N  | 1.085568  | -0.120728 | 0.306810  |
| N  | 0.657567  | 1.979157  | 0.009212  |
| C  | 1.809500  | -1.379036 | 0.342244  |
| H  | 2.881464  | -1.126538 | 0.308878  |
| H  | 1.584526  | -1.920433 | 1.274802  |
| H  | 1.549809  | -2.016489 | -0.521246 |
| C  | 0.790472  | 3.417747  | -0.300667 |
| H  | -0.086970 | 3.901334  | 0.173690  |
| C  | 2.093340  | 4.023414  | 0.347465  |
| H  | 2.001715  | 3.775491  | 1.451035  |
| H  | 1.903334  | 5.143258  | 0.289690  |
| O  | 3.243625  | 3.636494  | -0.233528 |
| Cu | 3.570875  | 1.397418  | -0.348419 |
| C  | 4.217501  | 1.643887  | -2.358867 |
| C  | 5.272768  | 1.561368  | -1.437995 |
| H  | 3.817989  | 2.619337  | -2.645709 |
| H  | 3.921933  | 0.780394  | -2.963414 |
| H  | 5.721720  | 2.474690  | -1.035642 |

|   |           |           |           |
|---|-----------|-----------|-----------|
| H | 5.859324  | 0.643587  | -1.326396 |
| C | 0.764590  | 3.634475  | -1.815344 |
| H | -0.147257 | 3.216020  | -2.275231 |
| H | 0.814505  | 4.713986  | -2.033656 |
| H | 1.652282  | 3.154420  | -2.250991 |
| C | 4.452837  | 0.754391  | 1.366683  |
| H | 5.110115  | -0.128959 | 1.231512  |
| H | 5.083959  | 1.586666  | 1.730980  |
| H | 3.719611  | 0.514925  | 2.161820  |

22

27 scf done: -547.182207

|    |           |           |           |
|----|-----------|-----------|-----------|
| C  | 1.084944  | 0.917431  | 0.739032  |
| C  | 0.764928  | 0.593471  | -0.641093 |
| C  | 0.783278  | -0.921265 | -0.781142 |
| H  | -0.117333 | -1.450028 | -0.434022 |
| H  | 0.999498  | -1.243219 | -1.809159 |
| C  | 1.308657  | -0.389352 | 1.484966  |
| H  | 1.966537  | -0.265360 | 2.356173  |
| H  | 0.402624  | -0.924478 | 1.807221  |
| C  | 1.759280  | 1.320761  | -1.533445 |
| C  | 2.285902  | 1.851128  | 0.732938  |
| H  | 2.074647  | 2.910574  | 0.522675  |
| H  | 1.552089  | 2.385120  | -1.721475 |
| C  | 1.960632  | -1.123283 | 0.249832  |
| H  | 2.208887  | -2.180353 | 0.440331  |
| C  | 2.960713  | 1.172532  | -0.521394 |
| H  | 3.886057  | 1.671633  | -0.852861 |
| C  | 3.220140  | -0.336804 | -0.227595 |
| H  | 3.621517  | -0.816783 | -1.137002 |
| H  | 4.009903  | -0.422840 | 0.538734  |
| H  | 1.897552  | 0.818895  | -2.500975 |
| H  | 2.863747  | 1.791724  | 1.665478  |
| Cu | -0.763031 | 1.556752  | 0.250663  |

Ethylene

6

scf done: -78.551868

|   |           |           |          |
|---|-----------|-----------|----------|
| C | -0.219809 | -0.034294 | 0.000000 |
| H | 0.298738  | -0.996964 | 0.000000 |
| H | -1.312759 | -0.067069 | 0.000000 |
| C | 0.450272  | 1.126899  | 0.000000 |
| H | -0.068274 | 2.089569  | 0.000000 |
| H | 1.543223  | 1.159674  | 0.000000 |

Strained olefin

21

scf done: -349.952751

|   |           |           |           |
|---|-----------|-----------|-----------|
| C | 1.080911  | 0.907085  | 0.701390  |
| C | 0.777843  | 0.600662  | -0.604676 |
| C | 0.786297  | -0.914917 | -0.766025 |
| H | -0.128021 | -1.436245 | -0.433437 |
| H | 1.006432  | -1.234384 | -1.796980 |
| C | 1.304312  | -0.390395 | 1.468855  |
| H | 1.966013  | -0.263482 | 2.340234  |
| H | 0.390899  | -0.911355 | 1.804331  |
| C | 1.761205  | 1.323636  | -1.517255 |
| C | 2.280801  | 1.846739  | 0.717665  |
| H | 2.058275  | 2.910462  | 0.524124  |
| H | 1.536646  | 2.385848  | -1.716176 |
| C | 1.956438  | -1.140679 | 0.254960  |
| H | 2.231576  | -2.199638 | 0.439735  |
| C | 2.970974  | 1.187071  | -0.527348 |
| H | 3.915627  | 1.665664  | -0.858595 |
| C | 3.220118  | -0.336942 | -0.227497 |
| H | 3.620089  | -0.817213 | -1.138904 |
| H | 4.009202  | -0.421790 | 0.541504  |

H 1.899530 0.816466 -2.485170  
H 2.859516 1.782835 1.652661

## MP2

7

1 scf done: -274.608776  
C -2.225876 -1.262200 -0.239224  
H -1.949181 -1.688644 -1.197591  
H -2.462919 -1.950859 0.564788  
C -2.490131 0.084088 -0.115971  
H -2.426617 0.743682 -0.974915  
H -2.940387 0.481533 0.787458  
Cu -0.496452 -0.277570 0.411131

22

2 scf done: -578.615408  
C -0.070071 -0.165345 0.676439  
C 1.782145 0.794686 -0.199005  
C -0.228410 1.195099 0.758136  
H -1.042331 1.787130 1.140306  
H -0.715884 -0.968851 0.986806  
N 1.152101 -0.380894 0.091960  
N 0.906011 1.752056 0.224584  
C 1.722228 -1.711724 -0.122051  
H 0.949141 -2.369763 -0.509390  
H 2.522501 -1.631370 -0.850932  
H 2.111037 -2.104568 0.814515  
Cu 3.472415 1.039520 -1.001065  
C 4.924602 1.303350 -2.450250  
C 5.515682 1.282065 -1.212519  
H 4.663882 2.240162 -2.929025  
H 4.868381 0.407585 -3.057981  
H 5.736601 2.201717 -0.683053  
H 5.940867 0.369096 -0.811870  
C 1.104493 3.194245 0.074079  
H 2.162236 3.382947 -0.079956  
H 0.534178 3.561226 -0.776049  
H 0.779936 3.692925 0.983309

24

3 scf done: -579.793459  
C -0.133671 -0.258132 0.670901  
C 1.768152 0.785028 -0.182205  
C -0.243592 1.248353 0.899977  
H -0.100258 1.521561 1.948949  
H -0.805923 -0.609698 -0.116500  
N 1.261597 -0.389927 0.213686  
N 0.890658 1.754948 0.106231  
C 1.796782 -1.702772 -0.106183  
H 2.836936 -1.600265 -0.403661  
H 1.741367 -2.341354 0.773646  
H 1.229832 -2.161616 -0.918160  
Cu 3.459704 1.035861 -1.019032  
C 4.912296 1.227982 -2.497449  
C 5.500584 1.361469 -1.267445  
H 4.600202 2.097004 -3.065203  
H 4.898349 0.272784 -3.009618  
H 5.668930 2.339535 -0.831607  
H 5.966279 0.515197 -0.775617  
C 1.143336 3.184502 0.036910  
H 1.341506 3.588499 1.031298  
H 2.002220 3.363413 -0.604362  
H 0.274902 3.686347 -0.386091  
H -1.181674 1.673040 0.547052  
H -0.301950 -0.846756 1.570965

15

4 scf done: -959.896776  
C -1.786201 -1.095664 0.504042  
H -1.526406 -2.147432 0.479026  
H -2.028386 -0.676123 1.473274  
C -2.127866 -0.426636 -0.659075  
H -2.139246 -0.945822 -1.610036  
H -2.646184 0.523983 -0.615430  
Cu -0.149356 -0.057130 -0.198095  
P 1.447164 -0.556366 1.293805  
H 1.068344 -1.044778 2.544037  
H 2.344774 -1.548052 0.893481  
H 2.337299 0.449782 1.671741  
P 0.460324 1.304582 -1.872866  
H 0.135585 0.892893 -3.165823  
H -0.123649 2.572226 -1.854367  
H 1.801857 1.647136 -2.044950

11

5 scf done: -617.270065  
C -2.284745 -1.265460 -0.254360  
H -2.036190 -1.700892 -1.215885  
H -2.462730 -1.947544 0.569654  
C -2.559343 0.070689 -0.135330  
H -2.535238 0.724713 -0.999959  
H -2.961769 0.477918 0.785613  
Cu -0.523817 -0.250641 0.306527  
P 1.581321 0.125961 0.858181  
H 1.939076 1.464807 1.001877  
H 2.012879 -0.421477 2.064159  
H 2.544305 -0.337565 -0.035290

8

7 scf done: -374.527263  
C -2.105967 -1.247565 -0.211177  
H -1.927271 -1.689741 -1.184372  
H -2.356883 -1.935366 0.587910  
C -2.388055 0.116233 -0.090640  
H -2.431845 0.749896 -0.968778  
H -2.861572 0.504574 0.803523  
Cu -0.519946 -0.249363 0.311890  
F 1.116295 0.049985 0.751645

8

8 scf done: -734.550244  
C -2.171610 -1.254949 -0.226381  
H -1.965102 -1.694766 -1.194774  
H -2.392411 -1.940547 0.582985  
C -2.453163 0.098119 -0.106913  
H -2.471723 0.739620 -0.979839  
H -2.898961 0.493631 0.797911  
Cu -0.543013 -0.251794 0.303519  
Cl 1.420741 0.109337 0.823491

8

9 scf done: -2844.662930  
C -2.190987 -1.258009 -0.230805  
H -1.981422 -1.697658 -1.198581  
H -2.406585 -1.943101 0.580350  
C -2.473028 0.093483 -0.111665  
H -2.489336 0.735666 -0.984096  
H -2.914433 0.490014 0.794831  
Cu -0.553228 -0.252620 0.299499  
Br 1.533776 0.130876 0.850468

11

10 scf done: -314.631029  
C -2.182301 -1.252352 -0.228797  
H -1.967338 -1.692697 -1.194897  
H -2.395625 -1.938886 0.581533  
C -2.458995 0.096068 -0.108531  
H -2.466864 0.742409 -0.977821  
H -2.895178 0.495932 0.798852  
Cu -0.519243 -0.252707 0.309873  
C 1.282649 0.062631 0.784512  
H 1.966771 -0.177254 -0.032041  
H 1.432352 1.115985 1.036728  
H 1.580149 -0.524739 1.655835

12  
11 scf done: -389.688388  
C -2.094965 -1.289581 -0.394446  
H -1.786858 -1.541042 -1.402936  
H -2.315573 -2.126666 0.257691  
C -2.587902 -0.008207 -0.101291  
H -2.664598 0.741223 -0.880844  
H -3.195178 0.159582 0.780589  
Cu -0.729758 -0.182966 0.425414  
O 0.840837 0.295504 0.973403  
C 1.400232 0.212759 2.273437  
H 2.417531 0.610219 2.245808  
H 0.833108 0.797162 3.003845  
H 1.454417 -0.818700 2.633751

9  
12 scf done: -367.481107  
C -2.184413 -1.251678 -0.229044  
H -1.951462 -1.689615 -1.192219  
H -2.379404 -1.935836 0.588065  
C -2.463394 0.090699 -0.110372  
H -2.456565 0.740240 -0.977445  
H -2.884472 0.493824 0.802837  
Cu -0.505094 -0.245205 0.313392  
C 1.245251 0.074690 0.776355  
N 2.377063 0.281444 1.075421

28  
13 scf done: -619.727535  
C 0.241347 -0.221109 0.951142  
C 1.758685 1.094967 -0.240422  
C -0.477998 1.019629 0.432724  
H -1.067409 1.531519 1.193040  
H -0.298193 -1.148815 0.762256  
N 1.488613 -0.161758 0.180430  
N 0.659575 1.837010 0.000843  
C 2.529686 -1.146108 0.398266  
H 3.329986 -0.957010 -0.312342  
H 2.929950 -1.084501 1.414117  
H 2.127881 -2.145662 0.232761  
Cu 3.428685 1.748403 -0.863945  
C 3.693877 1.199624 -2.760703  
C 4.789275 1.947727 -2.256087  
H 2.965244 1.671263 -3.410547  
H 3.768231 0.121891 -2.856945  
H 4.901521 2.995591 -2.511393  
H 5.702522 1.446982 -1.954475  
C 0.463597 3.160361 -0.553918  
H -0.117820 3.765006 0.141862  
H 1.441558 3.614601 -0.692030  
H -0.061103 3.117881 -1.512530  
C 4.147694 2.680876 0.686706  
H 5.122181 3.148470 0.531583  
H 3.453372 3.463892 1.011793

H 4.245838 1.986494 1.528664  
H -1.123861 0.786930 -0.421796  
H 0.456156 -0.144928 2.023382

26  
14 scf done: -618.544315  
C 0.076462 -0.235222 0.589781  
C 1.760812 1.058645 -0.232921  
C -0.420976 1.027811 0.418522  
H -1.402947 1.430225 0.598049  
H -0.386250 -1.131720 0.964721  
N 1.392845 -0.189622 0.178318  
N 0.618981 1.789037 -0.072420  
C 2.322548 -1.307146 0.250216  
H 3.093152 -1.143553 -0.496668  
H 2.775956 -1.364197 1.238468  
H 1.789165 -2.231085 0.036758  
Cu 3.463302 1.748988 -0.771567  
C 4.062919 0.822721 -2.439860  
C 4.970511 1.828000 -2.014407  
H 3.379445 1.015313 -3.259229  
H 4.307419 -0.222383 -2.281291  
H 4.981042 2.797317 -2.500855  
H 5.891620 1.553973 -1.512280  
C 0.525041 3.197991 -0.432753  
H 1.529311 3.610907 -0.388652  
H 0.119171 3.307499 -1.437278  
H -0.119401 3.707024 0.280787  
C 3.933650 3.133604 0.523601  
H 4.026974 4.116648 0.048721  
H 3.217746 3.231933 1.346412  
H 4.908970 2.915332 0.969252

49  
15 scf done: -1765.661340  
C -5.926496 -0.328857 4.094318  
C -5.035854 -0.513186 3.054688  
C -5.019341 0.382874 1.951849  
C -5.994248 1.434020 1.901977  
C -6.884929 1.603363 2.993159  
C -6.866665 0.727225 4.059708  
H -5.923250 -1.016174 4.932159  
C -4.125385 0.209619 0.851163  
C -5.993226 2.323900 0.797595  
H -7.607637 2.411867 2.957438  
C -5.116660 2.145282 -0.252630  
C -4.153044 1.104104 -0.222642  
H -6.719884 3.129592 0.770309  
H -5.135431 2.833140 -1.091194  
C -3.129238 -0.891411 0.873952  
C -1.968663 -0.776539 1.698884  
C -3.350041 -2.053296 0.128373  
C -1.697215 0.394403 2.457440  
C -0.997616 -1.832336 1.688822  
C -2.384293 -3.092283 0.136942  
C -0.554691 0.480996 3.228900  
C 0.158218 -1.716459 2.503460  
C -1.253678 -2.997049 0.922092  
H -2.555013 -3.984684 -0.454425  
C 0.387224 -0.574001 3.243411  
H -0.364281 1.377459 3.807307  
H 0.879805 -2.526720 2.504467  
H -0.524274 -3.800604 0.925775  
H -7.557377 0.860727 4.883746  
H 1.277923 -0.492579 3.854945  
P -3.151262 0.748358 -1.709660  
H -3.119458 2.036433 -2.268716



|    |           |           |           |
|----|-----------|-----------|-----------|
| H  | -1.851169 | 0.726162  | -1.176884 |
| P  | -4.736503 | -2.104620 | -1.066167 |
| H  | -4.845837 | -3.497643 | -1.206180 |
| H  | -5.826127 | -1.919479 | -0.190386 |
| H  | -2.414069 | 1.206558  | 2.449737  |
| H  | -4.318721 | -1.324522 | 3.085625  |
| Cu | -3.991858 | -0.924121 | -2.914421 |
| C  | -2.529481 | -2.108616 | -3.431309 |
| H  | -2.893032 | -3.083486 | -3.768877 |
| H  | -1.970627 | -1.665786 | -4.260287 |
| H  | -1.818997 | -2.282386 | -2.616891 |
| C  | -5.609814 | 0.032464  | -3.707633 |
| H  | -6.515284 | -0.203751 | -3.162212 |
| C  | -5.046007 | -0.911547 | -4.594775 |
| H  | -5.509537 | -1.883284 | -4.721857 |
| H  | -4.407182 | -0.586299 | -5.407302 |
| H  | -5.417446 | 1.089299  | -3.856279 |

30

**16** scf done: -732.792324

|    |           |           |           |
|----|-----------|-----------|-----------|
| C  | -0.062557 | -0.232861 | 0.468526  |
| C  | 1.810506  | 0.992157  | -0.200978 |
| C  | -0.423264 | 1.247897  | 0.428498  |
| H  | -0.909133 | 1.604225  | 1.335809  |
| H  | -0.781213 | -0.870279 | -0.045752 |
| N  | 1.234426  | -0.231929 | -0.220306 |
| N  | 0.904555  | 1.859888  | 0.268829  |
| C  | 1.962788  | -1.475592 | -0.356955 |
| H  | 2.894301  | -1.269043 | -0.870997 |
| H  | 2.176532  | -1.913583 | 0.622737  |
| H  | 1.372349  | -2.185604 | -0.936420 |
| C  | 1.080001  | 3.319382  | 0.290352  |
| H  | 0.350541  | 3.685491  | 1.021582  |
| C  | 2.481297  | 3.673564  | 0.808940  |
| H  | 2.579362  | 3.193466  | 1.798760  |
| H  | 2.466877  | 4.760933  | 0.989668  |
| O  | 3.512027  | 3.346615  | -0.061938 |
| Cu | 3.546636  | 1.639811  | -0.782307 |
| C  | 4.568173  | 0.421935  | -1.939334 |
| C  | 5.230283  | 1.660528  | -1.762921 |
| H  | 4.035506  | 0.213940  | -2.861456 |
| H  | 4.929616  | -0.452068 | -1.407273 |
| H  | 5.168509  | 2.433712  | -2.519962 |
| H  | 6.050164  | 1.748960  | -1.059957 |
| C  | 0.789895  | 3.923696  | -1.077294 |
| H  | -0.194634 | 3.631600  | -1.445408 |
| H  | 0.823799  | 5.011763  | -1.015332 |
| H  | 1.551995  | 3.597173  | -1.781727 |
| H  | 0.061809  | -0.596103 | 1.495323  |
| H  | -1.053976 | 1.490794  | -0.432297 |

28

**17** scf done: -731.615209

|   |           |           |           |
|---|-----------|-----------|-----------|
| C | -0.063335 | -0.132094 | 0.352412  |
| C | 1.819222  | 1.001364  | -0.232423 |
| C | -0.303662 | 1.203428  | 0.547105  |
| H | -1.178445 | 1.718784  | 0.904760  |
| H | -0.687085 | -0.993979 | 0.516051  |
| N | 1.225688  | -0.224853 | -0.120414 |
| N | 0.850275  | 1.862289  | 0.193751  |
| C | 1.890234  | -1.484403 | -0.424844 |
| H | 2.826538  | -1.246892 | -0.916107 |
| H | 2.083336  | -2.038047 | 0.492554  |
| H | 1.261811  | -2.078070 | -1.085893 |
| C | 1.018933  | 3.328974  | 0.230167  |
| H | 0.275718  | 3.685545  | 0.950221  |
| C | 2.418318  | 3.678563  | 0.758871  |

|    |           |           |           |
|----|-----------|-----------|-----------|
| H  | 2.518913  | 3.179850  | 1.739508  |
| H  | 2.393579  | 4.761770  | 0.962105  |
| O  | 3.447413  | 3.377449  | -0.120702 |
| Cu | 3.546024  | 1.651031  | -0.802303 |
| C  | 4.632576  | 0.410420  | -1.870610 |
| C  | 5.271242  | 1.663792  | -1.707296 |
| H  | 4.148655  | 0.165232  | -2.810374 |
| H  | 4.978062  | -0.440966 | -1.292772 |
| H  | 5.237748  | 2.407003  | -2.495557 |
| H  | 6.057535  | 1.786700  | -0.971944 |
| C  | 0.745451  | 3.917667  | -1.144804 |
| H  | -0.240393 | 3.626910  | -1.508833 |
| H  | 0.793164  | 5.005461  | -1.090333 |
| H  | 1.508040  | 3.576358  | -1.840893 |

29

**18** scf done: -1167.691650

|    |           |           |           |
|----|-----------|-----------|-----------|
| C  | -1.231108 | 1.400011  | 0.899165  |
| C  | -0.536421 | 1.211360  | -0.321966 |
| C  | -0.756439 | 2.087752  | -1.394736 |
| C  | -1.656368 | 3.145854  | -1.276513 |
| C  | -2.345524 | 3.336004  | -0.076473 |
| C  | -2.139156 | 2.463790  | 0.996074  |
| H  | -0.215135 | 1.932168  | -2.321915 |
| H  | -1.815226 | 3.819266  | -2.109645 |
| H  | -3.048072 | 4.154209  | 0.024759  |
| H  | -2.687851 | 2.618679  | 1.918048  |
| P  | -1.119208 | 0.163779  | 2.244090  |
| H  | 0.018425  | 0.484500  | 2.986507  |
| H  | -2.102493 | 0.715894  | 3.087313  |
| C  | 0.432212  | 0.123151  | -0.466907 |
| N  | 0.820186  | -0.514953 | 0.584001  |
| C  | 1.768753  | -1.606986 | 0.462677  |
| H  | 1.920375  | -1.913771 | -0.580244 |
| H  | 2.728980  | -1.264924 | 0.852658  |
| C  | 1.389615  | -2.860929 | 1.291927  |
| O  | 2.256847  | -3.728168 | 1.383559  |
| O  | 0.197780  | -2.899982 | 1.828938  |
| H  | 0.806153  | -0.109664 | -1.472320 |
| Cu | -1.287814 | -1.880827 | 1.328183  |
| C  | -2.999894 | -1.810304 | 0.350366  |
| C  | -2.323652 | -3.018937 | 0.102922  |
| H  | -2.981417 | -1.011824 | -0.383811 |
| H  | -3.825521 | -1.782630 | 1.053181  |
| H  | -1.753683 | -3.157133 | -0.808481 |
| H  | -2.588093 | -3.922146 | 0.640201  |

9

**19** scf done: -474.201661

|    |           |           |           |
|----|-----------|-----------|-----------|
| C  | -2.217242 | 0.425741  | 1.211003  |
| H  | -2.560242 | -0.347473 | 1.889907  |
| H  | -2.242242 | 1.435830  | 1.605360  |
| C  | -2.206730 | 0.200531  | -0.188796 |
| H  | -2.541600 | -0.747439 | -0.595787 |
| H  | -2.223682 | 1.035865  | -0.880424 |
| Cu | -0.424608 | 0.004437  | 0.574225  |
| F  | 0.673200  | -0.413818 | -0.823605 |
| F  | 0.651070  | 0.047287  | 2.049080  |

9

**20** scf done: -1194.274410

|   |           |           |           |
|---|-----------|-----------|-----------|
| C | -2.267351 | 0.433619  | 1.205241  |
| H | -2.590221 | -0.343078 | 1.888454  |
| H | -2.272074 | 1.441249  | 1.603923  |
| C | -2.256757 | 0.209819  | -0.186584 |
| H | -2.571291 | -0.742690 | -0.596564 |
| H | -2.253189 | 1.041644  | -0.881090 |

|    |           |           |           |
|----|-----------|-----------|-----------|
| Cu | -0.464916 | 0.011453  | 0.572905  |
| Cl | 0.778457  | -0.489249 | -1.180109 |
| Cl | 0.750842  | 0.087614  | 2.412991  |

9

**21** scf done: -5414.503450

|    |           |           |           |
|----|-----------|-----------|-----------|
| C  | -2.280351 | 0.435816  | 1.202863  |
| H  | -2.595810 | -0.341954 | 1.887879  |
| H  | -2.277508 | 1.442772  | 1.602538  |
| C  | -2.269847 | 0.212136  | -0.185172 |
| H  | -2.576933 | -0.742299 | -0.595613 |
| H  | -2.258834 | 1.042457  | -0.880968 |
| Cu | -0.465245 | 0.011512  | 0.572898  |
| Br | 0.831255  | -0.518840 | -1.313560 |
| Br | 0.801198  | 0.099362  | 2.550098  |

15

**22** scf done: -354.399922

|    |           |           |           |
|----|-----------|-----------|-----------|
| C  | -1.225447 | -1.835470 | 0.113813  |
| H  | -0.570993 | -2.542929 | 0.612971  |
| H  | -2.185880 | -1.680420 | 0.594948  |
| C  | -1.063902 | -1.562084 | -1.275482 |
| H  | -0.285238 | -2.059276 | -1.845083 |
| H  | -1.900073 | -1.196673 | -1.863071 |
| Cu | -0.295813 | -0.100898 | -0.167701 |
| C  | 0.072337  | 0.626154  | 1.622095  |
| H  | -0.254043 | 0.034717  | 2.486751  |
| H  | 1.153404  | 0.786495  | 1.729794  |
| H  | -0.396151 | 1.615336  | 1.711812  |
| C  | 0.426908  | 1.226034  | -1.426444 |
| H  | 1.496592  | 1.369221  | -1.223261 |
| H  | 0.327317  | 1.015017  | -2.498590 |
| H  | -0.054121 | 2.195872  | -1.241941 |

17

**23** scf done: -504.518128

|    |           |           |           |
|----|-----------|-----------|-----------|
| C  | -1.736579 | -0.794666 | 0.894505  |
| H  | -1.522640 | -1.796352 | 1.252827  |
| H  | -2.027811 | -0.080951 | 1.658267  |
| C  | -2.087247 | -0.577138 | -0.462736 |
| H  | -2.144917 | -1.410359 | -1.155523 |
| H  | -2.650057 | 0.305040  | -0.750047 |
| Cu | -0.215683 | -0.104776 | -0.129210 |
| O  | 1.248137  | 0.054683  | 1.020220  |
| C  | 1.117273  | -0.297845 | 2.355217  |
| H  | 0.843567  | -1.358386 | 2.523243  |
| H  | 2.067810  | -0.147663 | 2.898398  |
| H  | 0.361126  | 0.291015  | 2.911457  |
| O  | 0.537903  | 0.495404  | -1.729607 |
| C  | -0.234992 | 0.540849  | -2.880359 |
| H  | -1.117884 | 1.206972  | -2.811963 |
| H  | 0.353624  | 0.916296  | -3.736917 |
| H  | -0.634045 | -0.441576 | -3.202060 |

33

**24** scf done: -1207.466030

|   |           |           |           |
|---|-----------|-----------|-----------|
| C | -1.070599 | 1.195687  | 0.942524  |
| C | -0.568314 | 1.128170  | -0.379547 |
| C | -1.054316 | 2.002586  | -1.364015 |
| C | -2.031746 | 2.948060  | -1.061579 |
| C | -2.537140 | 3.021394  | 0.239881  |
| C | -2.066449 | 2.145991  | 1.221183  |
| H | -0.661453 | 1.925560  | -2.373054 |
| H | -2.396829 | 3.620656  | -1.829578 |
| H | -3.303177 | 3.747932  | 0.487450  |
| H | -2.479946 | 2.201326  | 2.222402  |
| P | -0.634915 | -0.090404 | 2.183128  |

|    |           |           |           |
|----|-----------|-----------|-----------|
| H  | 0.566100  | 0.368799  | 2.738221  |
| H  | -1.494688 | 0.422687  | 3.186688  |
| C  | 0.462648  | 0.148688  | -0.721461 |
| N  | 1.147150  | -0.399189 | 0.219749  |
| C  | 2.105122  | -1.425799 | -0.137554 |
| H  | 2.100767  | -1.638998 | -1.214399 |
| H  | 3.101823  | -1.060660 | 0.127431  |
| C  | 1.934953  | -2.780250 | 0.626858  |
| O  | 2.678294  | -3.683671 | 0.192802  |
| O  | 1.128770  | -2.797961 | 1.616943  |
| H  | 0.600545  | -0.105893 | -1.781063 |
| Cu | -0.957074 | -2.199649 | 1.640803  |
| C  | -1.583044 | -2.337983 | -0.198181 |
| H  | -0.752224 | -2.713098 | -0.806154 |
| H  | -2.416360 | -3.037779 | -0.324134 |
| H  | -1.902349 | -1.381633 | -0.631663 |
| C  | -1.625157 | -3.834899 | 2.524679  |
| H  | -1.010217 | -4.634796 | 2.129017  |
| C  | -1.096612 | -2.968594 | 3.508449  |
| H  | -1.769527 | -2.406415 | 4.148942  |
| H  | -0.085295 | -3.112839 | 3.866398  |
| H  | -2.696970 | -3.941504 | 2.399983  |

34

**25** scf done: -772.525022

|    |           |           |           |
|----|-----------|-----------|-----------|
| C  | -0.106046 | -0.073392 | 0.693946  |
| C  | 1.719076  | 1.070226  | -0.212684 |
| C  | -0.517670 | 1.363507  | 0.402950  |
| H  | -1.025129 | 1.852187  | 1.236095  |
| H  | -0.845351 | -0.813617 | 0.380652  |
| N  | 1.124681  | -0.166711 | -0.090739 |
| N  | 0.788578  | 1.974399  | 0.145525  |
| C  | 1.952790  | -1.346019 | 0.042463  |
| H  | 2.816352  | -1.215486 | -0.604275 |
| H  | 2.308579  | -1.477593 | 1.069857  |
| H  | 1.384071  | -2.229051 | -0.259693 |
| C  | 0.920830  | 3.416807  | -0.088981 |
| H  | 0.150974  | 3.885894  | 0.539485  |
| C  | 2.318485  | 3.934137  | 0.360988  |
| H  | 2.420964  | 3.599170  | 1.421085  |
| H  | 2.173639  | 5.044296  | 0.421767  |
| O  | 3.326708  | 3.550878  | -0.457571 |
| Cu | 3.555615  | 1.429350  | -0.399275 |
| C  | 4.178155  | 1.354235  | -2.311523 |
| C  | 5.259127  | 1.357825  | -1.394641 |
| H  | 3.859237  | 2.282509  | -2.769145 |
| H  | 3.896312  | 0.438754  | -2.823099 |
| H  | 5.766664  | 2.288401  | -1.167118 |
| H  | 5.814694  | 0.446171  | -1.196277 |
| C  | 0.681498  | 3.732881  | -1.558592 |
| H  | -0.269525 | 3.330615  | -1.917876 |
| H  | 0.681412  | 4.813897  | -1.712910 |
| H  | 1.509603  | 3.301168  | -2.116795 |
| C  | 4.136712  | 1.066155  | 1.452845  |
| H  | 5.056179  | 0.470317  | 1.515305  |
| H  | 4.340492  | 2.043597  | 1.903528  |
| H  | 3.389431  | 0.565243  | 2.084242  |
| H  | 0.105825  | -0.214305 | 1.763723  |
| H  | -1.160284 | 1.423192  | -0.485209 |

32

**26** scf done: -771.344353

|   |           |           |           |
|---|-----------|-----------|-----------|
| C | -0.184487 | 0.048323  | 0.637191  |
| C | 1.710539  | 1.072897  | -0.135470 |
| C | -0.460422 | 1.382783  | 0.488070  |
| H | -1.357063 | 1.945100  | 0.687393  |
| H | -0.797393 | -0.767781 | 0.981318  |

|    |           |           |           |   |           |           |           |
|----|-----------|-----------|-----------|---|-----------|-----------|-----------|
| N  | 1.132366  | -0.107897 | 0.258546  | C | 0.783498  | 0.597967  | -0.606577 |
| N  | 0.695958  | 1.975328  | 0.022039  | C | 0.794144  | -0.908792 | -0.760830 |
| C  | 1.881716  | -1.350345 | 0.267357  | H | -0.112153 | -1.420789 | -0.428072 |
| H  | 2.926907  | -1.077859 | 0.403642  | H | 1.014124  | -1.226433 | -1.781136 |
| H  | 1.538657  | -1.974736 | 1.092259  | C | 1.308780  | -0.388416 | 1.458570  |
| H  | 1.756383  | -1.888959 | -0.673039 | H | 1.965321  | -0.264629 | 2.321088  |
| C  | 0.852950  | 3.414706  | -0.238946 | H | 0.401385  | -0.901463 | 1.786681  |
| H  | 0.004715  | 3.894066  | 0.266768  | C | 1.765028  | 1.317832  | -1.508040 |
| C  | 2.185939  | 3.942666  | 0.372224  | C | 2.279776  | 1.838120  | 0.711366  |
| H  | 2.158934  | 3.614871  | 1.441192  | H | 2.054540  | 2.889255  | 0.514879  |
| H  | 2.023180  | 5.051710  | 0.409979  | H | 1.540733  | 2.369994  | -1.700114 |
| O  | 3.283581  | 3.565303  | -0.317795 | C | 1.954320  | -1.131288 | 0.252689  |
| Cu | 3.567062  | 1.438564  | -0.374736 | H | 2.232266  | -2.178602 | 0.433796  |
| C  | 4.074384  | 1.484828  | -2.330066 | C | 2.963174  | 1.182402  | -0.523797 |
| C  | 5.201388  | 1.438545  | -1.470303 | H | 3.901746  | 1.650199  | -0.851165 |
| H  | 3.746982  | 2.439380  | -2.722983 | C | 3.205818  | -0.330346 | -0.225412 |
| H  | 3.766748  | 0.601201  | -2.880971 | H | 3.599924  | -0.805659 | -1.129460 |
| H  | 5.725144  | 2.355998  | -1.224965 | H | 3.986595  | -0.414755 | 0.537355  |
| H  | 5.768939  | 0.519876  | -1.354514 | H | 1.904204  | 0.815006  | -2.466225 |
| C  | 0.800905  | 3.666909  | -1.735927 | H | 2.855592  | 1.776430  | 1.636010  |
| H  | -0.133298 | 3.302723  | -2.170490 |   |           |           |           |
| H  | 0.889583  | 4.737277  | -1.930244 |   |           |           |           |
| H  | 1.648917  | 3.159205  | -2.188185 |   |           |           |           |
| C  | 4.291481  | 0.979545  | 1.408369  |   |           |           |           |
| H  | 5.192368  | 0.351323  | 1.390739  |   |           |           |           |
| H  | 4.565536  | 1.934339  | 1.870292  |   |           |           |           |
| H  | 3.572465  | 0.488564  | 2.080298  |   |           |           |           |

22

27 scf done: -545.298117

|    |           |           |           |
|----|-----------|-----------|-----------|
| C  | 1.092871  | 0.911244  | 0.731932  |
| C  | 0.775491  | 0.590712  | -0.635666 |
| C  | 0.790188  | -0.920436 | -0.771582 |
| H  | -0.107938 | -1.438804 | -0.430909 |
| H  | 1.007354  | -1.235765 | -1.791674 |
| C  | 1.311189  | -0.394093 | 1.473968  |
| H  | 1.965063  | -0.268219 | 2.336394  |
| H  | 0.408495  | -0.916984 | 1.795104  |
| C  | 1.766170  | 1.320620  | -1.523349 |
| C  | 2.287211  | 1.846942  | 0.722230  |
| H  | 2.069279  | 2.896395  | 0.515968  |
| H  | 1.552808  | 2.374672  | -1.710013 |
| C  | 1.956062  | -1.121284 | 0.249884  |
| H  | 2.217061  | -2.167052 | 0.434474  |
| C  | 2.955951  | 1.174645  | -0.520287 |
| H  | 3.881846  | 1.655537  | -0.847835 |
| C  | 3.204576  | -0.329578 | -0.225390 |
| H  | 3.598098  | -0.804099 | -1.129028 |
| H  | 3.984657  | -0.413613 | 0.536840  |
| H  | 1.902080  | 0.818847  | -2.480910 |
| H  | 2.859946  | 1.786378  | 1.647152  |
| Cu | -0.747293 | 1.550190  | 0.250576  |

### Ethylene

6

scf done: -78.317282

|   |           |           |          |
|---|-----------|-----------|----------|
| C | -3.562755 | -0.015462 | 0.000000 |
| H | -3.048281 | -0.965820 | 0.000000 |
| H | -4.643013 | -0.045586 | 0.000000 |
| C | -2.895414 | 1.141016  | 0.000000 |
| H | -3.409888 | 2.091374  | 0.000000 |
| H | -1.815157 | 1.171140  | 0.000000 |

### Constrained olefin

21

scf done: -348.968483

|   |          |          |          |
|---|----------|----------|----------|
| C | 1.086866 | 0.904725 | 0.701764 |
|---|----------|----------|----------|
